# Supplementary material for: The spatial and temporal organization of origin firing during the S-phase of fission yeast
Source: Genome Res. 2015 Mar;25(3):391–401. doi: 10.1101/gr.180372.114 (PMC4352884; doi:10.1101/gr.180372.114)
Supplement: Supplemental Material [file supp_gr.180372.114_Table_S2.xlsx]

## Sheet: wt_20%
Figure S15A Measurements (wt 20% DNA synthesis)
A - correspond to the left end position of each DNA molecule
N - correspond to unreplicated DNA length (kb)
G - correspond to replication track length (kb)
1	A	1	A	1	A	1	A	1	A	1	A	1	A	1	A	1	A	1	A	1	A	1	A	1	A	1	A	1	A	1	A	1	A	1	A	1	A	1	A	1	A	1	A	1	A	1	A	1	A
346.973	N	603.505	N	186.149	N	104.701	N	67.854	N	133.405	N	343.74	N	1.389	N	380.699	N	4.762	G	23.457	N	109.776	N	5.357	N	48.016	N	468.372	N	35.601	N	40.9415	N	77.2875	N	36.9125	N	175.751	N	19.499	N	66.363	N	39.9925	N	45.2395	N	23.679	N
1.587	G	1.19	G	1.587	G	1.19	G	1.19	G	1.19	G	1.19	G	1.984	G	5.556	G	3.77	N	5.952	G	9.921	G	2.778	G	8.73	G	20.335	G	2.778	G	3.571	G	2.889	G	3.175	G	1.587	G	1.19	G	5.952	G	7.143	G	3.175	G	10.714	G
216.759	N	138.451	N	311.705	N	353.329	N	121.81	N	40.234	N	184.871	N	285.053	N	7.013	N	1.19	G	10.715	N	5.354	N	20.691	N	33.3355	N	13.563	N	146.93	N	13.13	N	211.935	N	79.2445	N	69.922	N	36.724	N	44.983	N	10.6675	N	30.6125	N	20.04	N
3.175	G	1.587	G	1.587	G	1.587	G	1.19	G	1.19	G	3.175	G	11.911	G	1.19	G	3.155	N	1.19	G	19.085	G	1.19	G	3.175	G	6.793	G	2.381	G	4.525	G	3.988	G	1.984	G	3.571	G	5.556	G	15.476	G	34.114	G	4.762	G	4.762	G
28.7725	N	1.19	N	514.67	N	767.025	N	89.0655	N	35.138	N	407.13	N	100.885	N	4.88	N	20.7	G	172.413	N	3.5665	N	8.408	N	170.636	N	8.8575	N	99.1205	N	19.3685	N	185.681	N	14.7005	N	6.8775	N	5.5555	N	70.5945	N	6.5175	N	163.249	N	13.6905	N
1.19	G	3.175	G	3.199	G	4.762	G	10.732	G	1.19	G	1.19	G	3.968	G	1.19	G	3.382	N	1.984	G	11.118	G	1.19	G	11.905	G	2.662	G	2.778	G	1.984	G	5.397	G	3.571	G	1.984	G	2.381	G	11.905	G	3.571	G	1.587	G	13.889	G
115.345	N	2.397	N	42.409	N	344.53	N	429.016	N	44.98	N	150.191	N	2.778	N	46.807	N	9.136	G	38.651	N	11.1245	N	110.6	N	205.381	N	4.137	N	230.888	N	91.708	N	80.104	N	47.119	N	71.8495	N	4.5635	N	33.9665	N	5.756	N	168.03	N	20.833	N
3.968	G	1.587	G	8.343	G	2.778	G	2.381	G	1.19	G	4.437	G	5.556	G	2.414	G	7.938	N	1.19	G	3.175	G	9.161	G	11.508	G	1.984	G	3.175	G	2.778	G	9.161	G	7.937	G	4.365	G	10.714	G	27.587	G	20.639	G	1.587	G	7.937	G
802.275	N	719.413	N	81.7695	N	82.219	N	53.214	N	18.291	N	42.872	N	15.712	N	87.3815	N	14.882	G	3.969	N	90.678	N	52.929	N	63.114	N	2.7555	N	19.8535	N	82.2965	N	10.8155	N	7.5395	N	24.904	N	103.514	N	32.557	N	9.4835	N	296.592	N	5.159	N
2.381	G	1.587	G			1.19	G	3.571	G	1.19	G	2.381	G	1.19	G	3.199	G	10.913	N	1.19	G	5.159	G	2.381	G	5.952	G	4.437	G	5.556	G	5.159	G	10.416	G	9.524	G	1.587	G	1.587	G	4.762	G	5.57	G	1.19	G	19.841	G
83.7335	N	48.9145	N			52.6115	N	15.742	N	16.342	N	25.859	N	30.282	N	375.089	N	1.19	G	5.1595	N	31.9515	N	17.164	N	17.2655	N	15.876	N	127.468	N	100.26	N	8.6085	N	24.6265	N	5.8425	N	1.3895	N	20.638	N	1.7475	N	65.11	N	12.302	N
		2.778	G			1.587	G	2.381	G	1.19	G	3.593	G	1.19	G	4.383	G	60.526	N	8.1345	G	8.73	G	5.556	G	6.349	G	23.467	G	1.587	G	9.921	G	11.069	G	2.381	G	2.778	G	1.984	G	9.524	G	21.035	G	1.19	G	7.143	G
		363.716	N			105.597	N	92.8705	N	178.31	N	5.038	N	5.3695	N	1.774	N	8.9505	G	17.361	N	4.7695	N	8.3315	N	52.6585	N	199.23	N	242.512	N	16.186	N	14.189	N	37.1915	N	39.045	N	10.343	N	18.455	N	6.906	N	146.565	N	12.1025	N
		1.19	G			1.19	G	1.19	G	1.19	G	2.381	G	1.587	G	8.811	G	15.983	N	1.19	G	2.381	G	1.19	G	6.758	G	6.349	G	1.19	G	7.143	G	7.907	G	10.714	G	3.968	G	1.984	G	11.508	G	6.349	G	1.19	G	12.302	G
		73.2115	N			179.11	N	374.81	N	1.8055	N	43.3065	N	282.817	N	13.504	N	7.361	G	178.81	N	117.294	N	6.831	N	5.6285	N	69.6425	N	55.5675	N	41.311	N	8.51	N	26.211	N	22.808	N	34.147	N	15.6745	N	349.87	N	70.0445	N	85.5805	N
		1.587	G			1.19	G	1.19	G	3.175	G	9.066	G	2.778	G	3.199	G	1.389	N	1.19	G	1.984	G	1.984	G	6.793	G	1.19	G	5.159	G	5.159	G	22.427	G	6.746	G	5.952	G	1.19	G	2.381	G	11.111	G	11.111	G	16.313	G
		193.005	N			233.818	N	134.049	N	75.327	N	1.741	N	25.6645	N	18.9305	N	2.381	G	144.6	N	281.264	N	129.116	N	12.007	N	512.225	N	3.968	N	117.59	N	23.8245	N	50.6295	N	21.935	N	25.445	N	9.7225	N	209.894	N	10.7125	N	4.409	N
		7.2215	G			5.174	G	1.19	G	2.381	G			2.381	G	1.19	G	28.3735	N	5.7545	G	15.079	G	1.19	G	14.341	G			3.571	G	4.383	G	3.272	G	7.143	G	1.984	G	1.19	G	1.19	G	3.1	G	25.4	G	11.515	G
		206.726	N			23.431	N	241.413	N	10.5415	N			28.8965	N	219.125	N	1.19	G	249.627	N	172.918	N	31.1605	N	19.295	N			2.9765	N	4.626	N	7.9395	N	189.475	N	6.2395	N	26.0115	N	11.112	N	9.069	N	94.072	N	12.1535	N
		1.984	G			1.984	G	1.984	G	1.19	G			1.19	G	2.023	G	45.7115	N	3.571	G	7.143	G	2.381	G	7.705	G			3.968	G	6.349	G	4.525	G	7.143	G	1.587	G	1.587	G	1.19	G	11.238	G	5.556	G	25.474	G
		50.615	N			220.04	N	141.008	N	165.514	N			61.81	N	18.1395	N	1.587	G	186.238	N	1013.6	N	61.497	N	2.1085	N			297.021	N	62.9225	N	12.319	N	19.06	N	22.5375	N	18.853	N	35.9465	N	505.781	N	77.627	N	57.37	N
		1.19	G			1.587	G			2.381	G			1.19	G			115.412	N	5.952	G			8.025	G	6.758	G			1.19	G	5.556	G	15.111	G	3.175	G	1.984	G	8.333	G	21.657	G	4	G	1.19	G	10.714	G
		12.6415	N			85.2145	N			36.0795	N			127.2	N			1.19	G	266.429	N			175.424	N	8.5255	N			100.618	N	14.972	N	11.3505	N	24.645	N	33.224	N	3.5715	N	2.583	N			4.366	N	6.349	N
		1.587	G			1.984	G			1.984	G			2.381	G			23.0755	N	1.19	G			1.19	G	11.111	G			3.175	G	7.54	G	24.362	G	7.143	G	3.968	G	5.952	G	6.5475	G			1.19	G	10.714	G
		256.013	N			7.549	N			21.91	N			10.5225	N			2.381	G	46.272	N			168.815	N	7.3455	N			17.6745	N	12.439	N	4.5895	N	64.127	N	73.155	N	20.8365	N	1.191	N			6.553	N	1.984	N
		1.587	G			1.19	G			1.19	G			1.19	G			37.8305	N	1.19	G			7.581	G	7.54	G			1.984	G	7.55	G	5.219	G	5.159	G	1.19	G	3.175	G	1.19	G			14.286	G	11.508	G
		346.106	N			20.0735	N			27.5115	N			105.81	N			2.778	G	206.612	N			51.7915	N	68.52	N			24.0105	N	103.95	N	3.266	N	288.667	N	114.964	N	93.4595	N	1.191	N			3.584	N	24.008	N
						1.587	G			1.587	G			1.19	G			140.12	N	1.587	G			1.19	G	3.968	G			11.905	G	1.984	G	4.437	G	8.333	G	8.73	G	5.952	G	1.19	G			21.432	G	5.556	G
						80.8315	N			19.7035	N			188.899	N			2.381	G	237.612	N			11.0155	N	120.686	N			13.4915	N	37.3335	N	9.286	N	29.6175	N	33.09	N	46.902	N	1.1905	N			2.3835	N	29.3645	N
						1.984	G			1.19	G			1.19	G			120.814	N	30.556	G			1.587	G	5.556	G			19.048	G	6.349	G	3.765	G	5.556	G	1.19	G	1.984	G	18.4525	G			7.143	G	11.111	G
						9.127	N			215.514	N			219.81	N			3.175	G	1.19	N			28.2435	N	14.302	N			1.1905	N	4.167	N	5.0625	N	50.2505	N	8.786	N	30.367	N	1.19	N			3.9685	N	17.0635	N
						7.1425	G			2.381	G			2.777	G			26.5645	N	3.968	G			1.19	G	3.968	G			1.587	G	3.571	G	5.952	G	3.571	G	6.746	G	3.968	G	23.0165	G			4.762	G	9.524	G
						26.1905	N			18.254	N			5.953	N			1.19	G	2.381	N			99.31	N	702.375	N			4.762	N	26.088	N	13.1715	N	168.942	N	73.4415	N	36.321	N	1.5875	N			3.972	N	32.1525	N
						1.19	G			1.587	G			1.19	G			5.997	N	4.9605	G			1.19	G	10.317	G			11.905	G	3.175	G	8.025	G	1.984	G	3.571	G	1.19	G	4.762	G			26.984	G	10.317	G
						116.505	N			4.1815	N			208.81	N			1.19	G	12.9175	N			11.8565	N	156.559	N			1.191	N	12.876	N	15.0205	N	10.375	N	5.6105	N	259.505	N	38.0315	N			17.262	N	8.9285	N
										1.19	G			1.19	G			110.31	N	1.19	G			1.587	G	13.889	G			1.587	G	3.175	G	6.07	G	1.984	G	9.136	G			3.175	G			2.778	G	28.968	G
										1.588	N			250.81	N			1.19	G	3.175	N			111.073	N	41.8895	N			2.9765	N	357.202	N	472.094	N	11.1075	N	56.9535	N			22.0365	N			13.6905	N	2.584	N
										1.19	G			1.19	G			21.5845	N	1.19	G			3.968	G	3.968	G			7.1425	G	4.762	G	3.39	G	4.383	G	1.587	G			1.984	G			1.587	G	3.968	G
										54.6765	N			33.368	N			5.159	G	1.191	N			33.352	N	194.069	N			9.7225	N	5.952	N	80.6435	N	244.554	N	6.16	N			21.655	N			3.184	N	20.846	N
										1.587	G			5.952	G			118.564	N	1.19	G			1.984	G	6.349	G			9.524	G	3.968	G	3.175	G	10.317	G	3.571	G			5.556	G			11.905	G	2.778	G
										3.7855	N			179.3	N			1.19	G	1.1905	N			3.4335	N	286.289	N			2.579	N	75.1005	N	206.825	N	35.9285	N	40.4325	N			4.564	N			25.854	N	25.992	N
										1.19	G							148.612	N	4.365	G			1.587	G	5.556	G			2.778	G	3.175	G	6.07	G	6.746	G	6.46	G			1.19	G			1.587	G	8.73	G
										169.41	N							1.587	G	5.754	N			31.766	N	139.9	N			4.5635	N	286.733	N	812.431	N	13.298	N	203.47	N			137.528	N			167.799	N	11.711	N
										1.19	G							157.883	N	1.587	G			4.383	G	7.54	G			7.143	G	5.159	G	3.199	G	3.968	G					1.984	G			2.381	G	2.778	G
										196.612	N							7.143	G	72.925	N			11.2435	N	148.222	N			136.635	N	41.7065	N	363.805	N	22.6315	N					500.834	N			1.587	N	13.6945	N
										1.587	G							108.834	N	1.587	G			1.19	G	4.762	G			1.587	G	10.714	G			1.587	G					6.349	G			1.587	G	7.937	G
										33.6135	N							1.19	G	59.5795	N			13.578	N	251.994	N			203.413	N	226.537	N			205.359	N					7.54	N			82.8745	N	19.4535	N
										1.19	G							71.843	N	1.19	G			1.19	G	3.175	G			1.587	G	3.175	G			2.778	G					10.317	G			1.19	G	19.048	G
										89.59	N							1.19	G	5.7645	N			16.3755	N	9.9255	N			54.3115	N	139.287	N			6.159	N					16.4725	N			273.525	N	17.659	N
																		65.535	N	2.381	G			3.659	G	8.73	G			1.19	G	11.111	G			4.762	G					1.984	G			1.19	G	6.746	G
																		1.19	G	1.587	N			24.878	N	20.8365	N			58.5375	N	28.3815	N			106.593	N					117.215	N			172.779	N	80.357	N
																		24.283	N	3.7695	G			8.025	G	4.365	G			1.587	G	6.746	G			6.746	G					1.587	G			4.762	G	14.286	G
																		1.984	G	23.6195	N			204.187	N	140.281	N			203.671	N	10.911	N			119.368	N					103.842	N			1.2055	N	65.2775	N
																		35.284	N	3.571	G			1.587	G	2.381	G					6.362	G			7.937	G					1.587	G			3.175	G	4.365	G
																		1.19	G	147.901	N			5.9785	N	817.687	N					56.9585	N			57.997	N					18.486	N			61.4805	N	75.4945	N
																		164.11	N	1.984	G			12.754	G							3.571	G			2.381	G					3.571	G			6.746	G	6.746	G
																		1.19	G	40.0695	N			138.226	N							239.7	N			29.051	N					213.024	N			27.891	N	25.239	N
																		90.81	N	1.587	G			3.593	G							9.929	G			7.937	G					8.3335	G			5.952	G	4.762	G
																		1.19	G	29.2935	N			4.58	N							29.5525	N			4.7695	N					133.127	N			4.585	N	11.3235	N
																		146.81	N	1.19	G			3.199	G							5.57	G			3.968	G					1.984	G			9.532	G	18.651	G
																		1.19	G	41.025	N			469.307	N							141.877	N			207.346	N					90.027	N			4.3955	N	11.9055	N
																		105.386	N	1.19	G			3.7695	G							2.778	G			4.365	G					1.19	G			19.905	G	5.952	G
																		1.19	G	148.214	N			312.421	N							132.554	N			27.6035	N					179.036	N			10.343	N	10.7145	N
																		23.964	N	2.381	G			3.968	G							2.778	G									2.381	G			3.175	G	9.127	G
																		1.19	G	12.7405	N			2.822	N							109.928	N									54.2145	N			10.7715	N	42.285	N
																		113.31	N	5.556	G			4.762	G							3.571	G									1.19	G			8.766	G	15.079	G
																		1.19	G	192.635	N			46.651	N							52.7795	N									41.025	N			1.5825	N	21.7195	N
																		954.205	N	3.175	G			3.968	G							5.952	G									1.19	G			11.931	G	2.778	G
																				84.0825	N			8.5735	N							75.996	N									156.238	N			10.7685	N	6.5855	N
																				1.19	G			7.633	G																	6.547	G			3.968	G	11.931	G
																				137.413	N			23.701	N																	95.421	N			12.761	N	3.2145	N
																				1.984	G			1.587	G																	1.587	G			7.946	G	36.2695	G
																				26.4145	N			60.8785	N																	44.5855	N			8.961	N	26.199	N
																				1.587	G			5.778	G																					6.758	G	10.317	G
																				15.48	N			75.005	N																					25.342	N	35.3805	N
																				10.317	G			5.612	G																					7.946	G	9.524	G
																				95.4095	N			35.7705	N																					58.1045	N	14.166	N
																				5.556	G			4.047	G																					7.143	G	12.302	G
																				10.3225	N			7.7295	N																					29.643	N	25.2615	N
																				2.381	G			1.19	G																					5.159	G	7.937	G
																				3.3735	N			151.291	N																					10.7305	N	3.9895	N
																				1.984	G			1.19	G																					11.508	G	13.492	G
																				69.556	N			22.871	N																					22.045	N	25.6045	N
																				1.19	G																									9.524	G	5.159	G
																				327.81	N																									26.429	N	18.4655	N
																				1.19	G																									32.182	G	5.556	G
																				33.608	N																									84.657	N	9.5215	N
																				12.8965	G																									1.19	G	16.671	G
																				13.1235	N																									100.332	N	75.895	N
																				2.806	G																											12.327	G
																				41.914	N																											13.136	N
																				3.968	G																											8.333	G
																				166.024	N																											19.722	N
																				1.984	G																											15.893	G
																				149.178	N																											36.309	N
																																																3.175	G
																																																56.2545	N
																																																6.746	G
																																																66.721	N
																																																2.778	G
																																																8.558	N
																																																3.968	G
																																																76.253	N
																																																4.762	G
																																																4.175	N
																																																6.746	G
																																																25.5975	N
																																																7.937	G
																																																1.1905	N
																																																8.73	G
																																																5.9525	N
																																																11.111	G
																																																53.9735	N
																																																13.492	G
																																																12.698	N
																																																5.556	G
																																																119.087	N
																																																13.492	G
																																																53.1745	N
																																																2.381	G
																																																5.357	N
																																																5.159	G
																																																5.754	N
																																																7.143	G
																																																19.841	N
																																																21.429	G
																																																53.174	N
																																																2.381	G
																																																5.7545	N
																																																10.714	G
																																																27.3815	N
																																																8.333	G
																																																61.9045	N
																																																1.984	G
																																																150.629	N
																																																2.381	G
																																																204.239	N
																																																2.381	G
																																																56.638	N
																																																7.143	G
																																																25.6045	N
																																																6.746	G
																																																294.109	N
																																																1.984	G
																																																206.75	N
																																																4.525	G
																																																783.888	N
																																																2.778	G
																																																7.54	N
																																																1.984	G
																																																40.1235	N
																																																8.333	G
																																																259.3	N
																																																9.127	G
																																																23.621	N
																																																7.143	G
																																																418.257	N
																																																3.968	G
																																																231.651	N
																																																10.317	G
																																																42.168	N
																																																2.381	G
																																																345.973	N
																																																3.968	G
																																																25.443	N
[truncated: 10 more columns]

## Sheet: wt_50%
Figure S15B Measurements (wt 50% DNA synthesis)
A - correspond to the left end position of each DNA molecule
N - correspond to unreplicated DNA length (kb)
G - correspond to replication track length (kb)
1	A	1	A	1	A	1	A	1	A	1	A	1	A	1	A	1	A	1	A	1	A	1	A	1	A	1	A	1	A	1	A	1	A	1	A	1	A	1	A	1	A	1	A	1	A	1	A
101.7	N	1.587	G	18.056	N	68.669	N	16.2695	N	153.005	N	67.065	N	10.714	G	2.778	G	4.365	N	15.3	G	6.057	N	33.225	G	15.163	N	33.418	N	8.739	G	21.088	N	12.454	N	79.5	N	19.085	G	1.984	G	5.159	N	5.556	G	28.582	N
3.549	G	1.19	N	1.19	G	1.587	G	2.381	G	3.175	G	6.349	G	3.571	N	1.19	N	2.381	G	6.746	N	73.2	G	39.358	N	1.587	G	11.964	G	2.381	N	16.671	G	11.556	G	3.175	G	3.571	N	21.829	N	1.984	G	1.587	N	55.988	G
29.496	N	3.175	G	1.191	N	16.275	N	85.746	N	249.5	N	53.968	N	1.984	G	3.175	G	7.154	N	8.333	G	9.136	N	64.76	G	5.174	N	9.161	N	18.271	G	3.175	N	11.111	N	89.246	N	3.988	G	7.937	G	56.914	N	15.481	G	1.587	N
5.57	G	152.865	N	1.19	G	2.381	G	6.349	G	5.952	G	5.159	G	6.349	N	9.557	N	13.912	G	2.381	N	5.57	G	105.234	N	4.778	G	2.778	G	3.175	N	22.8	G	1.587	G	97.271	G	8.333	N	19.052	N	5.556	G	19.052	N	3.571	G
28.275	N	2.778	G	1.786	N	47.626	N	16.8655	N	186.2	N	141.8	N	15.476	G	3.968	G	26.614	N	9.127	G	2.381	N	6.349	G	5.966	N	12.359	N	11.535	G	415.9	N	14.688	N	24.597	N	23.019	G	18.254	G	53.665	N	22.236	G	4.762	N
1.587	G	53.175	N	3.968	G	3.175	G	1.19	G	7.54	G	5.952	G	3.571	N	1.587	N	1.587	G	21.432	N	57.341	G	2.381	N	1.19	G	6.758	G	1.19	N	1.19	G	19.857	G	1.587	G	16.289	N	8.73	N	6.349	G	19.064	N	41.277	G
737.7	N	1.19	G	34.326	N	52.387	N	24.8045	N	13.515	N	36.51	N	2.778	G	5.556	G	3.571	N	3.175	G	17.478	N	17.465	G	2.414	N	43.436	N	13.544	G	7.154	N	9.532	N	61.849	N	6.746	G	3.571	G	7.154	N	21.047	G	7.143	N
7.6	G	3.175	N	1.984	G	3.571	G	1.587	G	1.587	G	3.175	G	1.587	N	29.804	N	5.159	G	7.143	N	10.325	G	5.556	N	7.946	G	12.723	G	17.6	N	9.532	G	1.587	G	1.19	G	33.767	N	13.889	N	18.271	G	7.55	N	49.605	G
28.615	N	5.556	G	2.778	N	15.878	N	20.241	N	1.587	N	200.8	N	2.778	G	9.532	G	9.532	N	2.381	G	1.19	N	3.571	G	29.142	N	5.57	N	45.4	G	24.219	N	20.242	N	10.589	N	3.968	G	1.587	G	18.293	N	4.762	G	10.722	N
9.532	G	43.658	N	5.952	G	1.587	G	7.143	G	1.19	G	4.365	G	7.937	N	14.335	N	2.778	G	11.111	N	40.967	G	37.717	N	1.19	G	11.535	G	2.381	N	5.556	G	1.587	G	1.19	G	18.271	N	4.365	N	3.571	G	5.952	N	46.444	G
584.9	N	1.587	G	230.529	N	319.6	N	1.191	N	5.556	N	3.968	N	3.175	G	6.758	G	7.55	N	1.19	G	1.19	N	1.587	G	29.012	N	33.814	N	1.984	G	54.7	N	67.139	N	28.797	N	16.289	G	4.365	G	14.291	N	40.507	G	6.349	N
1.587	G	167.7	N	1.19	G	3.175	G	1.587	G	4.762	G	12.698	G	65.596	N	22.448	N	7.154	G	5.952	N	1.19	G	2.381	N	1.19	G	28.615	G	31.412	N	9.921	G	27.849	G	1.587	G	6.349	N	47.634	N	21.84	G	1.984	N	53.665	G
171.7	N	2.381	G	53.027	N	47.66	N	1.3895	N	23.426	N	1.984	N	6.349	G	3.659	G	11.535	N	1.19	G	10.744	N	39.336	G	35.398	N	8.739	N	17.478	G	12.705	N	1.984	N	41.247	N	22.254	G	3.175	G	32.182	N	13.895	G	5.966	N
3.175	G	204.424	N	4.762	G	1.587	G	6.746	G	1.19	G	4.365	G	7.54	N	1.636	N	7.154	G	85.326	N	11.931	G	23.443	N	1.19	G	1.587	G	6.362	N	5.952	G	37.717	G	794.9	G	1.19	N	3.175	N	9.127	G	1.19	N	29.857	G
203.9	N	1.19	G	133.167	N	90.943	N	52.2165	N	13.492	N	7.55	N	6.746	G	3.199	G	17.875	N	4.365	G	72.4	N	7.55	G	30.253	N	16.289	N	5.159	G	5.966	N	23.416	N	3.593	N	1.984	G	39.304	G	6.746	N	16.686	G	5.174	N
		40.67	N	3.175	G	1.19	G	6.349	G	2.381	G	4.762	G	43.319	N	5.219	N	3.175	G	7.143	N	3.988	G	1.984	N	10.348	G	7.154	G	8.739	N	4.365	G	1.587	G	116.762	G	16.289	N	25.013	N	20.669	G	9.532	N	24.634	G
		1.587	G	41.845	N	12.698	N	33.5505	N	20.242	N	101.587	N	5.952	G	3.593	G	11.139	N	7.143	G	46.566	N	13.895	G	54.69	N	12.723	N	41.3	G	49.206	N	5.966	N	36.682	N	5.174	G	7.946	G	13.912	N	19.114	G	1.587	N
		340.9	N	5.357	G	1.587	G	2.778	G	1.984	G	1.587	G	26.987	N	1.636	N	3.571	G	5.159	N	1.19	G	9.136	N	13.895	G	3.571	G	1.587	N	9.524	G	1.19	G	205.4	G	3.968	N	16.289	N	38.525	G	1.984	N	11.515	G
		1.587	G	139.317	N	86.144	N	79.5875	N	46.832	N	131.1	N	4.365	G	1.587	G	27.031	N	7.143	G	1.984	N	11.911	G	1.587	N	16.686	N	18.271	G	33.732	N	12.705	N	6.399	N	3.571	G	9.136	G	21.047	N	17.897	G	6.349	N
		12.754	N	3.968	G	2.778	G	1.587	G	5.952	G	1.19	G	23.813	N	3.199	N	2.778	G	29.762	N	5.219	G	25.821	N	2.778	G	17.137	G	35.002	N	1.587	G	42.155	G	2.381	G	6.362	N	19.481	N	19.048	G	2.778	N	17.875	G
		1.587	G	68.5805	N	21.84	N	1.5875	N	47.621	N	23.813	N	6.349	G	9.23	G	60.401	N	7.54	G	29.461	N	7.154	G	17.897	N	22.675	N	7.946	G	32.939	N	53.212	N	19.196	N	1.984	G	2.381	G	3.175	N	6.362	G	5.966	N
		62.428	N	8.333	G	1.587	G	3.968	G	3.175	G	7.143	G	3.968	N	7.187	N	1.984	G	1.984	N	72.04	G	28.979	N	7.946	G	9.952	G	18.361	N	9.127	G	14.688	G	1.19	G	5.174	N	48.427	N	51.215	G	1.587	N	11.515	G
		1.19	G	10.166	N	19.845	N	33.739	N	191.7	N	44.446	N	10.714	G	1.587	G	59.3	N	3.175	G	59.26	N	13.895	G	8.766	N	22.675	N	20.335	G	1.984	N	8.333	N	189.9	N	3.988	G	7.937	G	63.2	N	5.159	G	11.515	N
		11.535	N	1.587	G	4.762	G	4.762	G	5.952	G	1.587	G	51.266	N	2.778	N	1.587	G	1.587	N	5.57	G	8.333	N	1.19	G	3.593	G	24.759	N	19.444	G	3.908	G	2.381	G	3.175	N	15.878	N	13.149	G	15.1	N	20.8	G
				41.313	N	5.159	N	22.037	N	7.143	N	142.1	N	1.587	G	3.199	G	81.117	N	9.524	G	31	N	4.365	G	11.931	N	6.758	N	11.931	G	35.317	N	1.775	N	67.293	N	7.54	G	9.524	G	5.159	N	1.587	G	9.598	N
				1.587	G	3.175	G	1.19	G	1.587	G	2.778	G	20.65	N	48.9	N	8.73	G	3.968	N	1.587	G	10.325	N	15.522	G	8.739	G	7.946	N	9.127	G	6.349	G	2.778	G	27.031	N	43.283	N	55.727	G	12.308	N	7.937	G
				4.7625	N	27.384	N	345.329	N	100.844	N	7.54	N	2.778	G	10.325	G	47.645	N	11.111	G	5.57	N	9.532	G	13.515	N	36.218	N	3.571	G	15.878	N	8.73	N	50.586	N	19.481	G	11.905	G	4.383	N	18.718	G	31.786	N
				3.968	G	3.175	G	5.952	G	1.587	G	1.587	G	19.857	N	7.55	N	1.19	G	36.12	N	3.175	G	38.543	N	36.682	G	19.088	G	16.742	N	10.722	G	3.175	G	1.587	G	60.844	N	15.481	N	8.811	G	11.535	N	85.158	G
				57.4635	N	71.644	N	50.329	N	101.3	N	17.46	N	11.118	G	1.587	G	2.778	N	1.19	G	220.142	N	7.143	G	23.577	N	46.908	N	1.19	G	1.19	N	8.333	N	13.94	N	12.327	G	8.333	G	16.836	N	1.19	G	8.343	N
				9.921	G			1.19	G	1.19	G	1.984	G	1.984	N	3.571	N	3.968	G	3.175	N	7.154	G	31.372	N	8.766	G	4.778	G	1.587	N	124.294	G	1.984	G	2.381	G	13.515	N	1.587	N	14.091	G	15.522	N	1.587	G
				51.3295	N			11.905	N	13.095	N	17.46	N	5.556	G	1.587	G	10.325	N	2.381	G	1.587	N	8.343	G	19.509	N	77.5	N	1.19	G	12.4	N	12.698	N	435.7	N	1.984	G	7.54	G	1.19	N	5.966	G	21.125	N
				1.19	G			1.19	G	8.333	G	1.984	G	23.03	N	18.689	N	3.968	G	30.952	N	5.57	G	60.747	N	15.918	G	1.19	G	1.19	N	1.19	G	5.159	G	1.984	G	2.778	N	1.19	N	2.381	G	21.883	N	48.18	G
				460.111	N			35.5185	N	4.365	N	18.254	N	7.143	G	1.587	G	2.778	N	5.159	G	56	N	10.325	G	6.758	N	72.18	N	22.675	G	1.19	N	2.381	N	25.508	N	4.778	G	11.111	G	3.272	N	1.984	G	16.289	N
				1.587	G			2.381	G	1.587	G	4.365	G	13.101	N	1.587	N	1.587	G	4.762	N	2.381	G	2.381	N	6.758	G	11.964	G	10.744	N	22.4	G	15.878	G	3.968	G	6.758	N	3.968	N	56	G	15.557	N	4.762	G
				62.114	N			213.116	N	61.967	N	267.1	N	4.762	G	10.348	G	3.968	N	5.159	G	141.493	N	8.739	G	19.481	N	106.928	N	16.711	G	1.19	N	6.746	N	6.399	N	14.688	G	15.476	G	10.117	N	12.754	G	1.587	N
				1.587	G			1.587	G	17.465	G	1.587	G	2.778	N	51.685	N	1.19	G	21.035	N	1.19	G	48.042	N	5.159	G	1.19	G	19.481	N	14.286	G	1.984	G	7.154	G	4.762	N	7.937	N	1.19	G	25.903	N	38.543	G
				1.1905	N			9.325	N	218.5	N	17.478	N	3.571	G	27.089	G	40.89	N	4.365	G	213.7	N	2.381	G	11.515	N	172.8	N	19.5	G	4.778	N	11.905	N	223	N	2.381	G	5.952	G	12.53	N	1.19	G	9.935	N
				3.968	G			5.159	G	5.159	G	2.778	G	10.722	N	1.984	N	1.19	G	31.359	N	1.587	G	35.734	N	14.704	G	20.335	G	6.758	N	17	G	5.159	G	1.587	G	1.587	N	1.19	N	28.2	G	13.637	N	44.112	G
				6.548	N			4.96	N	8.739	N	113.2	N	3.571	G	8.343	G	5.556	N	1.19	G	231.1	N	7.55	G	49.732	N	68.944	N	10.325	G	5.556	N	2.778	N	97.768	N	48.025	G	4.365	G	5.57	N	1.19	G	5.57	N
				1.19	G			3.175	G	1.587	G			20.65	N	8.739	N	15.7	G	77.034	N			16.289	N	9.929	G	5.966	G	13.94	N	25.821	G	20.65	G	1.587	G	8.343	N	4.365	N	14.291	G	11.175	N	1.19	G
				12.521	N			81.754	N	91.019	N			1.587	G	1.19	G	16.686	N	9.127	G			10.325	G	5.174	N	35.427	N	5.57	G	8.73	N	4.762	N	72.4	N	3.571	G	4.365	G	7.5	N	1.19	G	3.593	N
				4.762	G			3.175	G	1.587	G			1.19	N	31.077	N	1.984	G	5.556	N			7.946	N	60.4	G	34.274	G	3.175	N	35.723	G	1.19	G	1.587	G	7.154	N	1.587	N	12.308	G	64.598	N	34.136	G
				126.857	N			103.796	N	7.946	N			6.349	G	1.19	G	30.579	N	1.984	G			1.984	G	20.273	N	25.05	N	3.968	G	15.079	N	9.524	N	138.027	N	5.556	G	22.226	G	62.779	N	43.474	G	8.343	N
				9.524	G			3.571	G	2.381	G			3.175	N	21.462	N	8.343	G	25.806	N			48.913	N	9.532	G	1.587	G	7.54	N	3.968	G	3.571	G	3.175	G	15.893	N	1.984	N	19.461	G	7.976	N	19.064	G
				77.1985	N			67.9225	N	1.19	N			3.175	G	2.381	G	6.758	N	1.984	G			4.762	G	27.803	N	13.912	N	20.254	G	14.286	N	1.984	N	76.059	N	13.101	G	7.937	G	2.381	N	17.573	G	9.929	N
				1.587	G			1.984	G	1.984	G			85	N	27.453	N	7.54	G	17.875	N			46.115	N	19.461	G	6.758	G	64.7	N	1.19	G	1.984	G			26.7	N	1.587	N	1.587	G	15.952	N	58.334	G
				455.723	N			270.723	N	158.842	N			6.746	G	1.587	G	5.159	N	5.556	G			5.966	G	12.302	N	1.984	N	20.238	G	7.937	N	1.775	N			3.571	G	15.873	G	3.968	N	14.731	G	2.778	N
				3.968	G			3.571	G					36.131	N	16.313	N	5.159	G	2.778	N			11.535	N	21.032	G	1.984	G	202.2	N	9.127	G	1.19	G			3.593	N	14.683	N	8.333	G	3.199	N	15.163	G
				112.174	N			104.264	N					8.73	G	2.778	G	3.571	N	1.19	G			31.786	G	1.19	N	53.353	N	1.19	G	28.993	N	4.908	N			12.705	G	21.032	G	16.275	N	1.19	G
				5.556	G			1.19	G					104.781	N	2.381	N	3.571	G	9.127	N			2.381	N	15.878	G	13.515	G	58.241	N	12.308	G	16.671	G			1.984	N	1.984	N	5.952	G	5.57	N
				283.227	N			102.26	N					1.587	G	3.968	G	5.556	N	5.952	G			1.587	G	17.068	N	19.481	N	13.912	G	10.325	N	9.532	N			15.878	G	38.5	G	32.204	N	10.348	G
				1.19	G			1.19	G					38.891	N	78.8	N	4.762	G	22.623	N			35.065	N	4.762	G	28.615	G	56.228	N	1.587	G	10.722	G			1.19	N	1.19	N	1.19	G	17.178	N
				20.368	N			49.5175	N					2.381	G	1.587	G	2.778	N	1.587	G			1.587	G	17.875	N	11.139	N	5.966	G	25.409	N	1.587	N			9.557	G	5.966	G	60.381	N	6.793	G
				1.984	G			3.175	G					1.587	N	4.778	N	8.739	G	26.202	N			18.718	N	5.57	G	7.55	G	26.661	N	1.587	G	22.65	G			13.119	N	1.19	N	29.762	G	15.163	N
				43.1415	N			113.754	N					1.587	G	3.593	G	21.032	N	7.143	G			12.327	G	32.975	N	30.993	N	12.327	G	3.968	N	32.937	N			41.819	G	36.12	G	13.095	N	1.19	G
				1.587	G			1.19	G					1.587	N	25.154	N	7.946	G	31.749	N			125.4	N	7.154	G	6.758	G	5.966	N	16.27	G	3.571	G			2.381	N	7.143	N	2.778	G	10.325	N
				349.212	N			130.042	N					14.688	G	10.744	G	1.587	N	6.349	G			1.984	G	26.59	N	28.2	N	1.984	G	19.048	N	25.806	N			11.118	G	6.746	G	28.993	N	1.19	G
				1.19	G			9.127	G					30.566	N	32.735	N	1.587	G	111.1	N			1.19	N	1.19	G	28.2	G	155.9	N	9.524	G	2.381	G			4.365	N	11.905	N	2.381	G	15.497	N
				105.389	N			20.117	N					11.905	G	1.587	G	19.052	N	5.952	G			15.126	G	46.047	N	25.013	N	1.19	G	1.984	N	1.587	N			27.057	G	5.556	G	17.068	N	35.855	G
								1.587	G					26.193	N	7.55	N	1.587	G	4.762	N			52.958	N	1.984	G	12.327	G	40.967	N	9.524	G	12.705	G			2.778	N	11.111	N	12.308	G	1.587	N
								1.3895	N					9.921	G	11.515	G	12.705	N	13.889	G			1.587	G	4.762	N	9.136	N	6.362	G	1.984	N	35.46	N			9.161	G	17.063	G	5.952	N	30.325	G
								1.19	G					1.587	N	39.384	N	5.159	G	2.381	N			53.783	N	1.587	G	18.271	G	26.661	N	15.079	G	22.675	G			9.929	N	3.571	N	11.111	G	29.496	N
								19.536	N					1.587	G	1.19	G	10.714	N	6.349	G			1.984	G	92.2	N	3.571	N	10.386	G	69.1	N	44.452	N			4.778	G	1.19	G	33.371	N	1.19	G
								2.778	G					82.983	N	110.521	N	15.481	G	8.73	N			91.2	N	6.746	G	15.952	G	58.101	N	1.19	G	1.19	G			1.984	N	1.587	N	2.778	G	34.669	N
								114.616	N					1.587	G	3.175	G	3.175	N	6.349	G			3.571	G	95.665	N	2.381	N	11.139	G	23.823	N	13.895	N			7.946	G	2.381	G	11.911	N	7.55	G
								1.19	G					4.762	N	66.6	N	1.19	G	67.868	N			23.928	N	1.19	G	1.19	G	163.5	N	14.688	G	1.587	G			13.149	N	1.984	N	4.365	G	11.964	N
								23.6605	N					3.571	G	7.55	G	40.89	N	6.746	G			4.762	G	6.746	N	11.931	N			9.929	N	3.571	N			11.118	G	2.778	G	18.655	N	3.571	G
								2.381	G					17.063	N	206.8	N	1.587	G	7.143	N			106.888	N	10.317	G	9.136	G			1.587	G	15.481	G			18.668	N	23.813	N	1.19	G	6.07	N
								61.62	N					3.175	G	1.984	G	55.578	N	9.127	G			1.984	G	5.159	N	83.941	N			6.9	N	13.515	N			4.365	G	32.937	G	2.381	N	3.571	G
								4.365	G					3.968	N	36.25	N	3.968	G	63.9	N			121	N	7.143	G	12.723	G			1.19	G	23.426	G			47.7	N	5.159	N	11.911	G	7.154	N
								71.232	N					1.984	G	2.381	G	100.492	N	9.921	G			14.308	G	155.6	N	104.73	N			7.143	N	40.128	N			3.571	G	6.746	G	20.254	N	1.984	G
								3.571	G					125.5	N	59.212	N	1.587	G	72.2	N			74.372	N	19.048	G					1.19	G	35.769	G			45.697	N	2.778	N	2.381	G	10.348	N
								114.043	N					2.778	G	6.399	G	3.571	N	1.587	G			15.557	G	148.823	N					14.683	N	5.174	N			6.746	G	4.365	G	5.556	N	7.976	G
								6.758	G					1.587	N	24.807	N	1.984	G	8.333	N			124.237	N	1.984	G					32.946	G	9.532	G			2.778	N	5.556	N	31.372	G	1.19	N
								24.58	N					1.984	G	9.992	G	2.381	N	1.984	G			1.19	G	8.333	N					32.946	N	3.968	N			1.587	G	52.778	G	15.893	N	43.766	G
														13.492	N	26.382	N	7.946	G	34.129	N					15.878	G					16.27	G	1.19	G			4.778	N	9.524	N	1.984	G	40.275	N
														1.984	G	5.966	G	25.4	N	8.333	G					13.515	N					17.862	N	58.367	N			2.778	G	9.524	G	31.412	N	15.126	G
														31.359	N	29.581	N	5.57	G	20.242	N					3.571	G					44.1	G	1.19	G			7.946	N	1.984	N	40.546	G	3.968	N
														3.571	G	7.241	G	14.704	N	5.159	G					131.756	N							5.159	N			1.984	G	8.73	G	3.571	N	35.103	G
														13.095	N	2.806	N	13.101	G	6.746	N					1.587	G							1.587	G			8.739	N	7.143	N	26.614	G	24.414	N
														1.19	G	2.381	G	1.984	N	1.587	G					26.987	N							19.064	N			22.254	G	7.937	G	15.126	N	2.381	G
														10.714	N	53.158	N	1.587	G	4.762	N					25	G							7.54	G			2.381	N	1.587	N	26.6	G	19.249	N
														17.063	G	2.381	G	16.667	N	4.762	G					55.568	N							16.275	N			5.952	G	2.778	G	4.762	N	25.474	G
														6.746	N	6.793	N	1.587	G	11.905	N					4.365	G							35.794	G			6.362	N	23.823	N	1.19	G	50.818	N
														2.778	G	4.383	G	114	N	1.19	G					99.3	N							22.254	N			6.349	G	1.19	G	4.365	N	19.845	G
														78.969	N	54.905	N	1.984	G	6.349	N					13.889	G							1.587	G			30.253	N	7.54	N	34.544	G	43.2	N
														3.968	G	9.952	G	3.549	N	3.571	G					65.916	N							1.984	N			3.571	G	6.746	G	1.984	N	39.6	G
														175.5	N	25.903	N			28.2	N													4.762	G			4.365	N	2.778	N	5.952	G	7.143	N
														2.778	G	1.19	G			2.778	G													7.946	N			8.343	G	1.587	G	7.937	N	184.6	G
														13.498	N	10.744	N			60.319	N													2.381	G			1.984	N	1.984	N	17.862	G	10.78	N
														6.349	G	2.381	G			8.333	G													3.571	N			9.929	G	9.127	G	10.722	N	31.044	G
														85.747	N	35.855	N			7.55	N													3.175	G			1.587	N	1.587	N	5.159	G	3.968	N
														1.984	G	1.587	G																	10.722	N			8.739	G	9.929	G	5.952	N	28.219	G
														55.194	N	4.365	N																	12.705	G			17.082	N	7.946	N	21.84	G	1.984	N
														1.19	G	4.762	G																	19.064	N			3.175	G	1.984	G	9.136	N	21.858	G
														27.781	N	46.202	N																	3.175	G			7.946	N	1.587	N	77.9	G	3.968	N
														2.381	G	13.498	G																	22.633	N			4.762	G	9.921	G	5.952	N	47	G
														328.6	N	5.57	N																	31.389	G			15.497	N	9.532	N	5.57	G	7.154	N
																4.762	G																	12.302	N			3.571	G	1.19	G	4.778	N	117.195	G
																203.3	N																	11.508	G			9.532	N	1.587	N	20.16	G	22.311	N
																3.175	G																	11.911	N			3.571	G	3.175	G	14.1	N	7.154	G
																127.184	N																	32.165	G			13.101	N	1.587	N	17.532	G	27.564	N
																2.381	G																	41.8	N			3.175	G	4.762	G	7.54	N	1.587	G
																40.6	N																	11.515	G			6.362	N	9.136	N	1.19	G	2.806	N
																1.587	G																	2.778	N			8.343	G	1.19	G	1.587	N	13.544	G
																11.139	N																	30.182	G			24.258	N	6.758	N	3.968	G	3.571	N
																																		63.909	N			8.333	G	1.19	G	4.365	N	29.461	G
																																		2.381	G			1.19	N	3.571	N	15.1	G	46.4	N
																																		125.487	N			6.362	G	2.778	G	13.515	N	19.984	G
																																		8.73	G			29.461	N	21.5	N	1.587	G	11.569	N
																																		79.049	N			3.571	G	3.571	G	5.556	N	61.088	G
																																		1.587	G			12.723	N	13.895	N	12.308	G	9.598	N
																																		62.9	N			9.929	G	5.159	G	8.739	N	27.959	G
																																						25.842	N	16.686	N	22.279	G	6.746	N
																																								1.19	G	1.19	N
																																								1.587	N	36.9	G
																																								1.984	G	12.705	N
																																								12.327	N	6.349	G
																																								9.136	G	5.556	N
																																								18.668	N	14.704	G
																																								19.064	G	36.585	N
																																								6.362	N	44.135	G
																																								7.946	G	5.952	N
																																								12.723	N	21.065	G
																																								8.343	G
																																								2.778	N
																																								1.587	G
																																								1.587	N
																																								27.427	G
																																								2.381	N
																																								1.19	G
																																								3.571	N
																																								2.778	G
																																								11.118	N
																																								1.19	G
																																								3.968	N
																																								7.55	G
																																								6.758	N
																																								1.19	G
																																								1.984	N
																																								32.204	G
																																								3.988	N
																																								13.895	G
																																								17.501	N
																																								3.175	G
																																								35.338	N
																																								1.984	G
																																								30.579	N
																																								1.587	G
																																								26.59	N
																																								29.772	G
																																								14.688	N
																																								7.54	G
																																								24.616	N
																																								64.742	G
																																								3.571	N
																																								1.587	G
																																								1.984	N

## Sheet: wt_Pulse_Chase
Figure S15C Measurements (wt Pulse/Chase, 50% DNA synthesis)
A - correspond to the left end position of each DNA molecule
N - correspond to unreplicated DNA length (kb)
G - correspond to BrdU replication track length (kb)
R - correspond to EdU replication track length (kb)
1	A	1	A	1	A	1	A	1	A	1	A	1	A	1	A	1	A	1	A	1	A	1	A	1	A	1	A	1	A	1	A	1	A	1	A	1	A	1	A	1	A	1	A	1	A	1	A	1	A
80.194	N	104.808	N	208.425	N	32.554	N	121.482	N	15.086	N	54.389	N	3.176	R	241.773	N	4.764	N	29.775	N	31.76	N	132.201	N	3.176	N	20.644	R	8.734	N	32.951	N	23.026	R	117.115	N	6.749	R	30.569	N	13.895	G	8.337	R	66.299	N	17.071	N
1.588	R	1.588	R	8.337	R	11.91	R	10.719	R	11.513	R	8.734	R	8.337	N	1.985	R	4.764	R	7.543	R	5.558	R	13.101	R	12.704	R	9.131	G	2.779	R	4.764	R	18.262	G	4.367	R	6.352	G	15.483	R	19.056	R	45.258	G	19.056	R	4.764	R
2.382	G	139.744	N	89.722	N	1.588	G	69.078	N	17.468	N	3.573	N	4.367	R	35.333	N	7.543	N	1.588	N	49.625	N	3.176	N	5.161	G	13.101	R	5.955	N	2.779	G	23.82	R	1.588	N	16.277	N	37.715	N	52.801	G	8.337	R	1.985	G	1.985	G
1.985	R	3.97	R	4.764	R	9.925	R	2.382	R	9.528	R	5.558	R	2.382	G	5.161	R	7.146	R	7.146	R	5.955	R	5.955	R	8.734	R	3.97	G	7.543	R	16.674	N	2.779	N	7.146	R	12.704	R	5.955	R	8.734	R	4.764	N	10.719	R	20.247	R
13.895	N	13.101	N	10.322	G	27.79	N	78.606	N	56.374	N	10.322	N	4.367	R	3.97	G	9.528	N	9.131	G	2.779	G	2.382	N	2.382	N	6.749	R	4.764	G	7.94	R	5.558	R	1.588	G	4.367	N	3.176	G	5.558	G	8.734	R	1.588	G	3.97	G
1.588	R	5.558	R	5.161	R	23.026	R	9.925	R	4.367	R	4.367	R	10.322	G	5.558	R	11.513	R	13.895	R	5.558	R	8.337	R	3.97	R	5.161	G	3.573	R	1.588	G	9.131	N	16.277	R	9.528	R	14.689	R	3.97	R	3.176	G	7.94	R	5.558	R
1.191	G	19.453	N	9.528	N	123.467	N	3.176	G	14.292	N	30.966	N	7.94	R	5.161	N	10.719	N	14.689	N	37.318	N	3.176	N	33.348	N	11.513	R	7.146	G	34.142	N	7.146	R	11.513	G	38.509	N	21.438	N	6.749	G	13.895	R	3.97	G	3.176	G
1.985	R	4.367	R	9.528	R	5.161	R	9.131	R	14.292	R	1.985	R	75.033	N	19.453	R	7.94	R	7.146	R	3.97	G	1.588	R	28.981	R	6.749	N	7.543	R	7.146	R	5.161	G	17.468	R	17.865	R	8.734	R	8.734	R	2.382	G	8.734	R	8.337	R
43.273	N	19.056	N	2.382	N	3.97	G	30.966	N	70.269	N	5.558	G	4.764	R	1.985	G	29.775	N	3.573	G	5.955	R	7.94	N	22.232	N	13.895	R	10.719	N	10.322	N	9.528	R	21.041	N	1.985	N	3.176	G	9.528	N	12.704	R	3.573	G	8.734	N
2.779	R	7.543	R	2.382	R	4.764	R	16.674	R	5.955	R	7.543	R	4.367	G	19.056	R	9.131	R	10.719	R	3.573	N	1.191	R	13.895	R	3.97	G	5.558	R	9.925	R	20.644	G	12.307	R	17.071	R	3.97	R	7.94	R	1.985	N	11.116	R	4.764	R
1.191	G	30.569	N	3.176	G	121.879	N	54.786	N	1.191	G	208.822	N	7.94	R	4.367	G	4.764	G	42.479	N	9.528	R	45.258	N	17.865	N	24.217	R	1.985	G	6.749	N	11.116	R	5.558	G	17.071	N	3.97	G	14.689	N	8.337	R	19.453	G	19.85	N
1.588	R	9.131	R	7.94	R	13.895	R	19.85	R	6.352	R	5.955	R	2.382	G	6.352	R	11.513	R	10.322	R	5.955	N	3.97	R	8.734	R	1.985	G	9.131	R	6.749	R	5.955	G	11.91	R	61.932	R	13.498	R	8.734	R	6.352	G	6.749	R	14.292	R
125.452	N	37.318	N	20.644	N	4.367	N	31.363	N	98.059	N	5.955	G	4.764	R	72.651	N	113.939	N	6.749	N	3.573	R	2.382	G	6.352	G	5.955	R	9.528	N	5.955	N	7.146	R	22.629	N	11.513	G	11.513	G	18.262	N	9.131	R	26.599	N	15.483	N
4.764	R	3.97	R	12.704	R	14.292	R	6.352	R	1.588	R	8.734	R	2.779	N	2.382	R	1.985	R	3.176	R	30.172	N	8.337	R	5.161	R	11.91	N	7.543	R	7.94	R	15.086	G	5.955	R	11.116	R	16.277	R	6.749	R	4.764	G	12.704	R	5.955	G
42.876	N	37.715	N	6.749	G	2.382	N	81.782	N	6.352	N	20.247	N	1.588	G	4.764	N	51.61	N	20.247	N	10.322	R	1.588	G	15.483	N	11.513	R	1.985	G	1.985	G	7.146	R	7.543	G	5.558	G	30.569	G	6.352	G	12.704	R	7.94	N	9.528	R
9.528	R	2.382	R	3.97	R	13.895	R	5.955	R	11.91	R	3.97	R	1.985	R	3.176	R	13.101	R	5.161	R	2.779	G	8.337	R	2.382	R	12.704	G	8.337	R	15.88	R	28.584	N	7.94	R	46.052	R	3.97	R	2.779	R	7.94	G	11.513	R	1.588	G
28.584	N	1.191	G	33.348	N	11.91	N	9.925	N	31.363	N	29.378	N	136.965	N	10.322	N	1.588	G	59.55	N	3.573	R	7.543	G	26.202	N	7.146	R	4.764	G	16.674	G	4.764	R	14.689	G	1.985	G	5.161	G	12.704	G	8.337	R	18.262	N	13.101	R
4.764	R	3.176	R			2.382	G	13.498	R	12.307	R	6.749	R	4.367	R	11.513	R	11.513	R	30.569	R	34.539	N	11.116	R	2.779	R	11.513	G	14.292	R	3.97	R	11.513	G	7.94	R	23.82	R	19.85	R	8.337	R	10.719	N	1.588	R	1.985	N
1.588	G	29.775	N			19.85	N	65.505	N	120.688	N	9.528	G	1.191	G	5.955	G	2.779	G	29.775	N	6.749	R	4.367	N	3.573	N	6.352	R	3.97	G	15.88	N	6.352	R	4.367	N	3.176	G	2.382	N	30.172	N	9.131	R	20.644	N	19.453	R
4.764	R	1.985	G			4.367	R	10.719	R	7.146	R	18.659	R	15.483	R	9.925	R	3.573	R	11.91	R	3.176	G	1.191	R	6.352	R	17.071	N	10.322	R	7.543	R	3.573	G	14.292	R	9.131	R	5.161	R	7.543	R	13.498	G	3.573	R	2.382	N
		16.674	N			47.64	N	3.97	G	1.588	G	7.146	G	10.719	G	5.558	G	2.779	N	40.891	N	7.543	R	19.85	N	4.764	G	6.352	R	5.558	N	14.689	G	2.779	R	3.97	N	11.91	G	44.464	N	25.805	N	6.749	R	11.91	N	7.146	R
		4.764	R			2.382	R	8.734	R	10.322	R	7.543	R	10.719	R	7.94	R	9.925	R	20.644	R	23.82	N	15.88	R	11.513	R	11.116	N	7.146	R	16.674	R	11.116	G	1.985	R	21.041	R	6.352	R	11.91	R	13.498	G	9.528	R	9.925	N
		24.614	N			66.299	N	30.172	N	1.191	G	78.606	N	13.895	N	39.303	N	21.835	N	2.779	G	5.161	R	49.625	N	1.191	G	9.528	R	1.191	G	10.719	G	3.573	R	8.337	N	5.955	G	15.88	G	8.734	G	9.131	R	18.262	G	8.734	R
		3.176	R			30.172	R	3.176	R	4.367	R	3.176	R	6.352	R	3.573	R	7.94	R	7.543	R	48.037	N	18.659	R	10.322	R	34.539	N	3.176	R	2.382	R	1.985	G	5.955	R	3.176	R	4.367	R	23.423	R	17.071	N	12.307	R	14.292	N
		11.513	N			22.629	N	1.588	N	23.026	N	2.382	G	1.588	G	1.985	G	105.602	N	2.382	N	18.659	R	7.146	N	7.146	G	7.146	R	1.588	N	21.041	N	9.528	R	2.779	N	7.94	G	2.382	G	5.161	G	8.734	R	19.453	N	4.764	R
		3.176	R			10.322	R	7.94	R	6.352	G	14.292	R	2.779	R	15.086	R	2.382	G	5.558	R	3.97	G	6.352	R	6.352	R	14.689	N	9.131	R	7.94	R	32.554	N	9.131	R	9.925	R	5.955	R	4.367	R	18.659	G	3.176	R	2.382	G
		58.359	N			40.097	N	5.161	N	13.895	N	6.749	G	4.367	N	48.434	N	37.715	N	4.367	N	3.573	R	63.917	N	23.82	N	5.955	R	40.097	N	7.543	G	20.247	R	1.588	G	3.176	G	4.367	N	11.91	G	11.91	R	9.528	N	12.704	R
		5.955	R			1.985	R	14.689	R	4.367	G	3.573	R	5.955	R	3.176	R	10.719	R	8.734	R	2.779	G	4.367	R	8.337	R	2.382	G	18.659	G	7.146	R	19.453	G	15.483	R	8.734	R	9.925	R	5.558	R	10.322	G	9.131	R	1.191	G
		1.588	N			17.468	N	1.588	N	24.217	N	61.138	N	3.573	G	3.176	G	45.655	N	11.116	G	8.734	R	6.352	N	8.734	G	7.94	R	14.292	R	2.779	G	19.453	R	1.985	G	8.337	N	13.101	G	13.498	N	10.719	R	23.82	G	4.367	R
		7.94	R			8.734	R	9.131	R	14.292	R	5.558	R	7.94	R	4.764	R	7.543	R	7.94	R	7.543	N	3.573	R	11.116	R	17.865	N	8.337	G	7.543	R	11.513	G	15.88	R	2.382	R	15.483	R	12.307	R	99.647	N	9.528	R	4.367	G
		25.011	N			50.022	N	4.367	G	39.303	N	1.985	G	4.367	N	55.58	N	2.779	G	35.73	N	4.764	R	8.337	G	10.322	G	10.719	R	5.955	R	4.367	G	15.483	R	13.498	G	10.322	N	8.734	N	2.779	G	2.779	R	3.573	N	7.146	R
		10.719	R			13.101	R	9.528	R	12.704	R	2.382	R	3.176	R	2.382	R	8.337	R	1.588	R	7.543	G	3.573	R	8.337	R	57.168	N	1.985	G	7.146	R	2.382	G	7.94	R	12.704	R	8.734	R	3.97	R	68.681	N	2.382	R	5.558	N
		74.239	N			88.928	N	66.299	N	1.985	G	5.161	G	61.535	N	31.76	N	3.573	N	8.734	N	21.835	R	7.146	N	77.415	N	3.97	R	14.292	R	12.704	N	14.292	R	20.644	N	3.176	G	2.779	G	26.599	G	12.704	R	26.202	N	28.584	R
		2.779	R			3.573	R	7.94	R	8.734	R	2.779	R	1.985	R	8.734	R	7.543	R	9.131	R	5.161	G	6.749	R	8.734	R	2.779	G	12.704	N	6.749	R	3.176	N	9.131	R	43.273	R	14.689	R	6.749	R	1.588	G	9.131	R	5.558	N
		125.452	N			144.508	N	1.191	G	83.767	N	98.059	N	2.382	G	1.191	G	1.985	G	4.764	G	7.94	R	2.779	G	5.558	G	6.352	R	21.835	R	11.91	G	10.719	R	7.543	N	4.764	G	10.322	G	3.97	N	9.925	R	2.779	N	6.749	R
		4.764	R			16.277	R	28.981	R	8.337	R	8.734	R	1.588	R	4.764	R	9.131	R	3.97	R	44.861	N	12.307	R	7.543	R	1.588	G	12.704	G	9.528	R	6.352	G	7.94	R	3.176	R	7.146	R	13.895	R	21.438	N	42.876	R	2.779	G
		41.685	N			63.123	N	1.588	G	1.588	N	37.318	N	18.659	N	10.322	N	14.292	N	12.704	N	8.337	R	5.558	N	7.146	G	3.573	R	11.91	R	10.322	G	30.172	R	7.543	G	53.198	G	15.086	N	5.558	G	9.925	R	22.232	G	11.513	R
		4.764	R			4.367	R	8.734	R	8.337	R	5.161	R	7.94	R	8.337	R	5.558	R	3.573	R	1.191	G	18.659	R	6.749	R	15.483	N	16.674	G	6.352	R	3.176	G	8.734	R	3.97	R	8.734	R	3.176	R	22.629	G	15.086	R	3.97	N
		8.337	N			11.91	N	24.614	N	2.382	N	4.764	G	71.063	N	1.588	G	15.483	N	3.176	G	4.764	R	3.176	N	8.734	N	7.146	R	19.85	R	39.7	N	10.719	R	31.76	N	13.101	G	3.573	G	2.382	G	26.599	R	12.307	G	10.322	R
		4.764	R			1.588	R	6.749	R	32.951	R	16.674	R	1.588	G	5.955	R	6.749	R	4.764	R	63.123	N	26.599	R	4.367	R	14.689	N	15.88	G	7.543	R	2.382	N	16.674	R	5.558	R	5.161	R	33.745	N	7.94	G	10.322	R	3.176	G
		3.573	N			9.131	N	1.191	G	5.161	N	1.985	G	1.985	R	61.932	N	5.161	N	25.011	N	6.749	R	2.779	G	4.367	G	6.352	R	7.543	R	1.985	G	7.543	R	4.764	G	12.307	G	21.041	N	12.307	R	9.528	R	23.82	G	7.543	R
		2.382	R			3.573	R	7.543	R	6.749	R	1.588	R	5.558	N	2.779	R	5.161	R	19.056	R	3.97	G	7.94	R	6.352	R	1.985	G	17.468	N	8.337	R	30.569	N	9.528	R	4.764	R	13.895	R	9.528	N	4.367	G	15.88	R	7.543	N
		19.453	N			9.528	N	28.584	N	30.172	N	58.756	N	7.543	R	46.846	N	10.719	N	16.277	N	7.94	R	19.85	N	4.367	N	11.116	R	13.498	R	12.704	G	6.352	R	1.985	N	3.176	N	7.94	G	8.337	R	7.94	R	26.996	G	3.573	R
		3.176	G			11.513	R	6.352	R			5.955	R	32.951	N	12.704	R	7.94	R	5.558	R	28.981	N	11.116	R	11.116	R	1.191	G	7.146	G	9.925	R	8.337	G	6.352	R	14.689	R	21.835	R	9.528	G	43.67	N	15.483	R	6.749	G
		12.307	N			20.644	N	12.307	N			17.865	N			49.228	N	3.573	G	12.307	N	6.352	R	32.157	N	1.985	G	4.367	R	18.659	R	3.573	N	15.88	R	5.161	G	8.337	N	9.925	N	10.322	R	9.131	R	18.262	G	23.423	R
		5.955	R			16.277	R	7.146	R			3.573	R			5.955	R	19.85	R	10.719	R	1.985	G	16.674	R	9.131	R			3.97	G	5.955	R	1.588	N	3.573	R	10.322	R	27.79	R	26.599	N	48.434	G	11.513	R	2.779	G
		8.734	N			6.352	N	17.468	N			2.779	N			6.352	G	22.232	N	26.599	N	7.543	R	7.543	G	31.76	N			16.277	R	15.88	G	7.94	R	3.176	G	5.161	N	13.498	N	3.176	R	8.734	R	22.629	G	17.468	R
		3.573	R					7.543	R			5.955	R			9.131	R	6.749	R			8.734	N	3.176	R	10.322	R			3.176	G	3.97	R	14.689	N	4.764	R	3.97	G			3.176	G	5.161	N	10.322	R	1.588	G
		4.764	N					2.779	G			32.554	N			14.292	G	1.191	G			6.749	R	7.146	G	1.588	G			11.91	R	15.086	N	8.734	R	3.176	G	26.202	R					5.161	R	2.382	N	3.176	R
		19.056	G					12.307	R			1.985	R			11.513	R	5.955	R			3.176	G	8.337	R	10.322	R			5.558	N	7.146	R	5.955	G	8.734	R	7.146	G					4.367	G	11.116	R	2.779	N
		13.101	R					60.741	N			2.779	N			28.584	N	8.734	N			27.79	N	2.382	N	5.558	G			5.955	R	26.996	G	9.131	R	29.775	N	15.086	R					9.131	R	5.161	G	8.337	R
		7.146	G					9.131	R			1.588	R			7.94	R	8.734	R			16.674	R	7.146	R	9.131	R			15.88	N	7.543	R	6.749	G	5.955	R	4.367	N					8.337	N	16.674	R	2.779	N
		30.569	N					8.337	G			4.367	G			2.779	G	13.498	N			13.101	N	1.985	G	1.588	N			9.528	R	3.573	N	13.895	R	1.588	G	14.292	R					7.146	R			7.146	R
		7.146	R					19.056	R			5.955	R			16.277	R	7.94	R			1.985	R	25.805	R	5.955	R			9.528	G	11.116	R	1.588	N	6.352	R	5.161	N					16.674	G			2.382	G
		9.528	N					36.921	N			29.775	N			3.176	G	4.367	G			1.588	G	27.393	N	1.191	G			8.734	R	7.543	N	22.629	R	1.588	N	11.116	G					15.88	R			16.277	R
		2.382	R					8.734	R			2.382	R			6.749	R	8.734	R			35.333	N	8.734	R	11.91	R			2.382	N			34.936	N	29.775	R	17.071	N					15.483	G			3.176	G
		61.932	N					35.333	N			34.539	N			37.318	N	26.996	N			5.558	R	30.172	N	5.558	G			14.292	R			7.94	R	4.764	N	14.689	R					10.322	R			25.408	R
		1.588	R					3.573	R			7.146	R			4.764	R	11.513	R			9.131	G	9.528	R	7.146	R			24.217	N			5.955	G	7.543	R	23.82	N					23.82	N			4.764	G
		32.554	N					71.46	N			7.94	N			4.367	G	7.543	G			3.97	R	6.352	G	17.865	N			9.528	R			7.543	R	9.131	G	17.071	R					11.513	R			43.273	R
		6.352	R					3.97	R			3.176	R			3.97	R	9.925	R			3.97	N	10.719	R	9.925	R			6.352	G			15.483	N	8.734	R	14.292	N					13.498	G			7.146	G
		3.97	N					2.779	G			2.779	N			28.187	N					3.573	R	3.97	N	3.176	G			3.176	R			2.382	R	3.97	N	19.85	R					8.734	R			14.689	R
		5.558	R					6.749	R			6.352	G			3.176	R					20.247	N	4.764	R	11.116	R			7.543	G			6.352	N	3.176	R	1.985	N					55.977	N			2.382	G
		15.483	N					44.067	N			5.161	R			1.588	G					7.146	R	3.573	G	1.985	N			15.88	R			27.393	R	11.116	N	14.689	R					16.674	R			21.041	R
		2.779	R					3.573	R			11.116	N			4.764	R					1.985	G	8.337	R	17.468	R			31.76	N			15.086	N	2.779	R	13.101	G					22.232	G			2.779	G
		9.528	N					10.322	N			5.161	R			31.76	N					7.146	R	1.588	G	21.438	N			11.116	R			13.895	R	20.247	N	8.734	R					9.925	R			6.749	R
		1.588	R					2.382	R			5.955	G			7.543	R					29.775	N	18.262	R	1.588	R			5.955	G			1.985	N	16.674	R	10.322	N					13.498	N			30.966	N
		7.543	N					77.415	N			9.131	R			9.925	N					7.94	R	35.73	N	1.191	G			15.483	R			17.468	R	1.985	N	3.573	R					13.895	R			18.262	R
		7.146	R									6.352	G			1.985	G					43.273	N	19.453	R	1.985	R			3.97	G			6.749	N	13.895	R	7.146	N					6.749	G			1.588	N
		3.97	N									4.367	R			2.779	R					13.498	R	3.176	N	3.573	N			20.247	R			11.513	R	11.513	G	4.764	G					2.382	R			2.779	R
		5.161	R									27.393	N			25.011	N					4.367	G	7.543	R	11.513	R			11.91	N			3.176	G	10.719	R	1.588	R					3.573	G			2.779	N
		275.121	N									4.367	R			5.955	R					7.94	R	1.985	N	36.921	N			9.131	R			2.382	R	20.247	N	4.367	G					9.131	R			11.91	R
												5.955	G			1.191	G					11.91	N	6.352	R	7.543	R			1.985	G			3.573	G	7.94	R	4.367	R					14.292	G			11.513	N
												4.367	R			3.97	R					11.116	R	12.307	N	29.775	N			12.307	R			32.951	R	7.543	G	4.764	G					17.865	R			5.955	R
												28.584	N			4.764	N					9.528	N	3.573	R	9.131	R			6.749	N			1.985	N	17.865	R	5.161	R					8.337	G			3.573	N
												1.588	G			7.543	R					6.749	R	4.367	N	4.764	G			7.543	R			4.764	R	5.161	G	15.88	N					3.97	R			7.94	R
												5.955	R			1.588	G					12.704	N	2.382	G	16.674	R			3.573	G			3.573	G	7.146	R	10.719	R					70.269	G			2.779	N
												2.382	G			8.337	R					2.779	R	13.498	N	2.382	G			30.172	R			14.689	R	19.056	N	40.891	N					9.131	R			1.588	G
												3.573	R			52.801	N					40.494	N	6.352	G	5.161	R			2.382	G			5.558	N	7.94	R	8.337	R					2.382	N			4.367	R
												27.79	N			4.367	R					6.749	R	5.558	R	2.779	N			9.528	R			11.513	R	3.176	G	5.161	G					8.337	R			6.352	N
												5.161	R			3.97	G					4.764	G	7.543	N	2.779	R			4.764	G			1.588	G	14.292	R	8.337	R					8.734	G			6.749	R
																9.925	R					3.97	R	15.483	R	29.775	N			16.277	R			25.805	R	9.131	G	43.273	N					9.131	R			3.573	G
																9.131	N					9.131	N	6.749	G	19.85	R			2.779	G			1.588	G	31.76	R	16.277	R					5.558	G			1.985	R
																						6.749	R	5.161	R	3.176	N			9.131	R			12.307	R	4.367	G	3.573	N					22.629	R			3.573	G
																						3.573	G	6.749	N	14.689	R			7.146	G			15.88	N	18.262	R	6.749	G					52.801	N			6.749	R
																						9.528	R	2.382	R	48.831	N			4.367	R			9.925	R	11.116	G	3.97	N					36.127	R			26.202	N
																						6.749	N	33.348	N	2.382	R			9.528	G			1.985	G	5.558	R	7.543	G					4.367	G			7.543	R
																						11.91	R	4.764	R	4.367	N			133.789	N			13.498	R			9.528	R					19.056	R			6.749	N
																						28.981	N	20.644	N	4.367	R			7.543	G			7.94	N			27.393	N					20.644	G			6.749	R
																						7.94	R	6.352	R					5.558	R			8.337	R			12.307	R					21.041	R			2.382	G
																						4.367	G	3.97	G					12.307	N			4.367	G			2.382	G					18.262	N			7.146	R
																						9.131	R	2.382	N					6.352	R			5.161	R			17.071	R					9.528	R			6.352	G
																						2.382	N	6.352	R					68.681	N			19.85	N			3.97	N					9.925	G			5.161	R
																						11.91	R	7.543	N					1.588	R			26.599	R			14.689	R					20.644	R			13.101	N
																						30.172	N	6.749	R					14.689	N			11.513	N			13.101	N					17.865	N			6.749	R
																						4.367	R	15.483	N									13.498	R			12.307	R					2.382	R			13.498	N
																						5.161	G	4.764	R									8.734	N			12.704	G					23.423	N			1.588	R
																						5.955	R	23.026	N									6.749	R			11.513	N					9.925	R			3.573	N
																						5.558	N	6.749	R									84.164	N			3.176	G					21.041	G			8.734	R
																						4.764	R	7.146	G									2.382	R			2.779	N					19.85	R			2.779	N
																						33.745	N	18.659	R									15.086	N			36.524	R					2.382	G
																						9.131	R	8.734	G									15.086	R			26.996	N					4.764	R
																						7.146	N	22.232	R									11.116	G			5.161	R					3.573	G
																						9.528	R	13.101	G									9.528	R			5.558	N					15.086	R
																						1.588	G	9.925	R									13.101	G			31.76	R					2.779	G
																						6.749	R	5.558	N									9.925	R			5.558	G					10.322	R
																						8.337	N	6.749	R									31.363	N			19.453	R					6.352	N
																						5.955	R	2.779	G									46.846	R			6.749	N					5.558	R
																						2.779	G	6.749	R									10.719	N			63.52	R					1.985	G
																						43.273	R	14.689	N									10.322	R			16.674	N					4.764	R
																						2.779	G	5.955	R									1.985	G			6.352	R					17.865	N
																						9.131	R	15.88	N									5.161	R			16.277	N					10.322	R
																						3.97	G	32.157	R									32.157	N			3.176	R					7.146	G
																						25.408	R	3.176	G									16.277	R			15.086	N					7.543	R
																						3.176	G	8.337	R									10.719	G			7.94	R					1.985	G
																						9.131	R	63.52	N									5.955	R			7.543	N					6.352	R
																						10.322	G	11.91	R									3.573	N			7.94	G					41.288	N
																						3.176	R	17.865	N									3.573	R			5.558	R					10.719	R
																						14.689	G	9.925	R									49.625	N			19.85	N					14.292	G
																						11.116	R	3.176	N									7.543	R			1.985	R					17.071	R
																						5.955	G	8.337	R									20.644	N			2.779	N					5.558	G
																						20.644	R											17.468	R			16.277	R					8.337	R
																						2.382	N											22.232	N			47.64	N
																						7.543	R											11.91	R			19.056	R
																						15.086	N											11.116	N			11.116	G
																						4.764	R											10.322	R			3.97	N
																						54.786	N											7.94	G			15.086	R
																						6.749	R											7.146	R			10.322	N
																						5.161	G											106.793	N			18.262	R
																						11.513	R											8.337	R			13.895	N
																						2.779	G											7.94	N			4.367	R
																						5.558	R											3.176	G			18.659	N
																																		8.337	R			23.82	R
																																		2.779	G			8.734	N
																																		3.176	N			25.805	R
																																		17.071	R			7.543	G
																																		7.146	N			26.202	R
																																		9.131	R			24.217	N
																																		1.588	N			10.322	R
																																		13.101	R			32.951	N
																																						12.307	R
																																						9.131	G
																																						9.528	R
																																						2.779	N
																																						2.779	R
																																						9.528	N
																																						74.636	R
																																						46.052	N
																																						38.906	R
																																						2.382	N
																																						5.161	R
																																						6.352	N
																																						5.161	R
																																						7.543	N
																																						4.367	R
																																						4.764	N
																																						4.764	R
																																						1.588	G
																																						3.176	R
																																						45.258	N
																																						1.985	R
																																						26.599	N
																																						9.528	R
																																						49.228	N
																																						11.513	R
																																						1.588	G
																																						24.614	R
																																						2.382	G
																																						14.292	R
																																						14.292	N
																																						32.554	R
																																						13.101	G
																																						15.88	R
																																						17.071	N
[truncated: 10 more columns]

## Sheet: wt_Chromosome I_left
Figure S15D Measurements (wt Chromosome I left part)
A - correspond to the left end position of each DNA molecule
N - correspond to unreplicated DNA length (kb)
G - correspond to replication track length (kb)
1	A	60.2766	A	743.778	A	878.104	A	660.462	A	361.905	A	58.0316	A	770.773	A	89.5093	A	466.326	A	784.126	A	23.4962	A	1	A	110.56	A	763.031	A	1071.41	A	555.333	A	1	A	735.97	A	1084.61	A	659.286	A	823.748	A	175.787	A	658.701	A	1	A
15.9328	N	1051.01	N	883.716	N	81.5835	N	188.515	N	6.76051	G	339.814	N	9.60224	N	16.277	N	277.403	N	196.197	N	3.176	G	40.7143	N	96.4694	N	27.443	G	51.0078	G	64.9496	G	23.423	G	21.1672	N	25.805	G	1.191	N	183.116	G	64.8948	G	140.07	G	216.409	G
2.382	G	2.382	G	3.97	G	2.779	G	2.382	G	180.737	N	2.382	G	6.0078	G	1.588	G	1.588	G	2.779	G	37.5399	N	9.56095	G	2.382	G	4.8299	N	6.749	N	6.27697	N	10.7849	N	1.588	G	33.8327	N	133.939	G	13.101	N	5.955	N	25.0237	N	4.367	N
866.024	N	93.7643	N	526.3	N	279.986	N	7.68314	N	3.176	G	214.577	N	195.529	N	98.7561	N	34.6569	N	45.7138	N	1.588	G	99.2274	N	33.8812	N	7.15712	G	5.955	G	16.9646	G	9.528	G	10.322	N	25.805	G	6.749	N	25.805	G	88.8022	G	319.662	G	258.586	G
2.382	G	1.588	G	1.588	G	3.50591	G	1.985	G	498.684	N	7.19523	G	3.97	G	1.588	G	1.588	G	1.985	G	137.142	N	3.176	G	20.247	G	6.41354	N	10.322	N	19.4653	N	4.764	N	13.9212	G	7.146	N	21.6571	G	12.704	N	10.322	N	5.161	N	3.97	N
53.4354	N	10.719	N	15.1178	N	80.8828	N	181.282	N	1.985	G	32.6167	N	11.1442	N	123.04	N	73.9158	N	281.343	N	2.382	G	658.274	N	120.036	N	8.42156	G	111.747	G	13.3158	G	20.3034	G	13.895	N	19.453	G	20.3399	N	54.8106	G	20.247	G	20.6591	G	61.6481	G
2.382	G	1.985	G	2.779	G	1.191	G	8.05751	G	51.4464	N	2.382	G	10.3538	G	2.382	G	3.573	G	1.985	G	142.958	N	1.985	G	3.573	G	118.243	N	46.449	N	6.00462	N	15.483	N	5.955	G	21.4416	N	5.955	G	8.337	N	4.367	N	20.2994	N	5.57229	N
1666.85	N	57.2224	N	38.7321	N	182.377	N	79.1955	N	5.161	G	83.0131	N	190.136	N	326.255	N	140.022	N	150.606	N	17.0766	G	71.9042	N	64.2576	N	22.2888	G	68.9883	G	40.9545	G	18.3859	G	26.599	N	34.217	G	5.161	N	189.424	G	26.202	G	91.8047	G	64.4657	G
4.84777	G	5.558	G	3.97	G	3.176	G	6.352	G	53.4783	N	1.985	G	1.985	G	3.59761	G	1.191	G	9.528	G	59.6929	N	3.573	G	16.277	G	92.4315	N	5.955	N	38.3907	N	8.337	N	12.2848	G	12.307	N	39.7187	G	32.157	N	4.764	N	8.337	N	4.78067	N
388.359	N	176.385	N	24.2369	N	11.91	N	51.2384	N	3.97	G	23.9208	N	89.4143	N	402.517	N	31.9617	N	55.58	N	21.143	G	44.9059	N	64.4291	N	3.573	G	127.583	G	21.1009	G	89.7422	G	35.0023	N	1.191	G	9.56095	N	1.588	G	28.981	G	13.101	G	30.6921	G
6.65491	G			5.161	G	2.382	G	1.985	G	95.75	N	2.382	G	1.588	G	3.573	G	5.558	G	15.086	G	72.1682	N	10.8496	G	3.176	G	21.889	N	7.543	N	9.82138	N	5.61437	N	10.3295	G	14.6946	N	76.3105	G	6.352	N	6.749	N	21.041	N	5.61874	N
9.925	N			37.0187	N	233.292	N	381.769	N	1.985	G	36.5391	N	58.072	N	89.8669	N	58.5774	N	7.543	N	3.02355	G	79.5941	N	32.554	N	3.573	G	2.382	G	10.4435	G	3.573	G	7.94	N	1.588	G	5.955	N	124.282	G	26.599	G	195.486	G	107.73	G
3.97	G			2.382	G	1.191	G	3.27366	G	25.6065	N	1.588	G	4.78067	G	10.719	G	3.97	G	1.588	G	9.83369	N	5.161	G	9.131	G	6.76051	N	8.734	N	8.09721	N	8.87732	N	446.22	G	62.4219	N	107.165	G	20.644	N	5.161	N	7.543	N	4.764	N
148.865	N			63.4144	N	89.0554	N	381.841	N	1.985	G	12.704	N	397.561	N	205.651	N	149.482	N	54.4045	N	1.985	G	99.1698	N	107.357	N	10.8603	G	83.0719	G	23.4365	G	11.513	G	7.15712	N	149.801	G	13.498	N	20.644	G	54.1802	G	11.513	G	805.261	G
										67.257	N	4.14468	G	5.57229	G	5.558	G	2.382	G	4.367	G	7.146	N	27.6792	G	10.719	G	93.1584	N	12.307	N	24.2916	N	11.5412	N	19.5546	G	35.7435	N	56.8202	G	6.352	N	5.955	N
										2.779	G	4.43846	N	98.5159	N	4.764	N	11.116	N	202.848	N	3.573	G	12.34	N	38.2744	N	12.7751	G	11.91	G	10.3069	G	9.131	G	7.543	N	87.8787	G	22.4114	N	8.734	G	5.161	G
										419.345	N	6.00979	G	3.176	G	4.367	G	10.322	G			91.0996	N	1.985	G	2.382	G	53.4287	N	20.3093	N	7.146	N	30.0231	N	17.4922	G	23.0601	N	37.3331	G	5.558	N	5.161	N
										21.835	G	189.471	N	350.858	N	54.0115	N	44.0662	N			2.779	G	68.5242	N	25.4398	N	1.985	G	6.749	G	7.58469	G	27.0587	G	25.5327	N	47.64	G	4.764	N	135.389	G	3.573	G
										438.99	N	3.59483	G	3.176	G	3.97	G	5.161	G			39.3542	N	2.382	G	1.191	G	12.7004	N	12.0299	N	15.3087	N	26.1087	N	3.97	G	12.9617	N	11.9695	G	11.116	N	5.558	N
										5.161	G	41.3075	N	52.6648	N	28.6785	N	150.782	N			2.382	G	12.4178	N	22.2642	N	20.7869	G	5.955	G	12.4662	G	21.7338	G	19.2692	N	53.279	G	50.4269	N	58.3646	G	74.5784	G
										419.068	N	4.14468	G	11.5412	G	10.322	G					6.27935	N	5.558	G	1.985	G	11.1442	N	12.7596	N	10.8361	N	4.764	N	38.767	G	7.543	N	127.126	G	6.352	N	6.749	N
										1.985	G	230.563	N	42.9093	N							14.292	G	89.9364	N	75.5793	N	6.749	G	4.367	G	81.6157	G	39.4213	G	77.4698	N	59.1161	G	18.2791	N	62.4993	G	108.74	G
										78.4746	N	4.367	G	8.74313	G							273.122	N	1.985	G	10.322	G	88.8256	N	23.8815	N	8.09721	N	8.18455	N	28.2954	G			8.37472	G	5.558	N	6.79863	N
										1.985	G	23.8232	N	9.66774	N							9.131	G	42.4814	N	49.3971	N	3.176	G	1.191	G	9.34419	G	10.0512	G	14.4294	N			18.6634	N	147.775	G	3.176	G
										40.5063	N			10.4443	G							10.6082	N	4.764	G	7.94	G	29.509	N	30.222	N	14.5643	N	10.7849	N	15.5052	G			43.331	G			10.322	N
										1.588	G			18.4137	N							2.779	G	13.7497	N	137.99	N	10.3295	G	9.925	G	89.6486	G	1.588	G	68.6651	N			8.734	N			8.734	G
										90.115	N			3.176	G							53.0388	N	2.382	G	9.925	G	55.2398	N	135.332	N	4.91049	N	14.2535	N	10.0512	G			42.8784	G			6.352	N
										2.382	G			73.1735	N							2.779	G	38.7166	N	16.277	N	12.7314	G	6.749	G	32.0808	G	4.764	G	11.2919	N			8.37472	N			91.8575	G
										86.2733	N			1.588	G							43.3568	N	9.528	G	32.3563	G	93.5713	N	17.468	N	5.22174	N	5.68425	N	1.985	G			4.367	G			5.558	N
										5.558	G			80.0963	N							4.367	G	17.341	N	54.8876	N	12.3324	G	78.953	G	25.5608	G	3.176	G	46.6801	N			6.749	N			61.9963	G
										50.4444	N			1.588	G							55.6785	N	12.895	G	6.352	G	27.8488	N	5.558	N	8.09721	N	15.6184	N	4.367	G			30.9811	G			8.02893	N
										1.985	G			43.5326	N							8.734	G	12.3324	N	92.5451	N	2.382	G	17.071	G	26.0087	G	89.743	G	25.5597	N			5.161	N			46.846	G
										67.991	N			3.98985	G							90.2349	N	3.97	G			67.8548	N	13.1252	N	42.4639	N	6.40163	N	26.3318	G			104.569	G			5.558	N
														65.6495	N							12.704	G	25.0185	N			11.9366	G	3.573	G	7.63629	G	30.8259	G	8.42156	N			18.2664	N			110.327	G
														3.76634	G							194.534	N	15.8848	G			12.7286	N	19.8706	N	6.749	N	15.6096	N	1.588	G			16.0757	G			4.764	N
														147.43	N							5.61437	G	29.06	N			14.292	G	1.588	G	4.764	G	237.87	G	15.6652	N			14.3484	N			102.013	G
														1.985	G							45.8257	N	4.764	G			10.7504	N	12.307	N	40.8882	N	11.6829	N	9.20842	G			2.382	G			5.161	N
														484.882	N							5.52981	G	204.318	N			3.176	G	3.573	G	22.8974	G	8.87732	G	14.4893	N			5.61437	N			98.7565	G
														25.4576	G							33.7676	N	8.337	G			5.558	N	49.3523	N	4.764	N	20.4368	N	7.58469	G			13.107	G			7.146	N
														413.596	N							23.3984	G	71.8808	N			6.54732	G	5.955	G	35.196	G	25.7931	G	22.2673	N			10.322	N			1.588	G
														1.985	G									3.97	G			40.3102	N	9.528	N	38.3776	N	35.9742	N	48.4713	G			42.8931	G			4.764	N
														296.266	N									4.367	N			15.88	G	1.191	G	2.382	G	48.3832	G	10.6896	N			30.5793	N			41.7473	G
														4.38486	G									12.704	G			29.0529	N	11.91	N	5.558	N	18.9274	N	1.588	G			37.3398	G			7.543	N
														83.8369	N									45.3005	N			18.2866	G	69.9955	G	1.985	G	38.4471	G	6.749	N			7.63629	N			76.409	G
														1.588	G									20.75	G			25.8324	N	43.8498	N	9.925	N	56.0691	N	27.1373	G			2.779	G
														55.2207	N									61.5517	N			4.367	G	9.528	G	28.3228	G	16.0039	G	4.764	N			7.58469	N
														10.7484	G									4.367	G			29.407	N	36.6435	N	24.726	N	39.9394	N	26.0718	G			14.292	G
														19.2656	N									17.865	N			8.74313	G	11.513	G	10.5975	G	77.2884	G	6.749	N			9.98137	N
														1.985	G									2.382	G					35.8102	N	17.9388	N	34.3361	N	49.9902	G			20.7147	G
														238.707	N									26.6435	N					4.764	G	6.352	G	42.5282	G	7.24446	N			7.19245	N
														6.07291	G									1.985	G					33.7716	N	5.558	N	32.7954	N	17.7157	G
														26.2826	N									125.146	N					11.116	G	16.7923	G	21.2212	G	22.1931	N
														1.985	G									10.322	G					25.8094	N	58.0275	N	31.1716	N	32.0256	G
														486.714	N									158.118	N					1.191	G	6.749	G	25.9567	G	21.4122	N
																								7.94	G					5.558	N	49.5885	N	19.9925	N	29.8917	G
																								26.6224	N					31.76	G	29.6269	G	24.3337	G	5.02165	N
																								3.176	G					21.8938	N	15.5644	N	25.2651	N	3.176	G
																								41.7557	N							9.60224	G	92.8504	G	17.071	N
																								13.101	G							16.1214	N	17.6296	N	2.382	G
																								42.084	N							11.1795	G	5.6239	G	7.543	N
																								1.985	G							5.161	N	65.7551	N	30.646	G
																								5.78032	N							27.9063	G	18.079	G
																								4.367	G									7.146	N
																								71.0237	N									40.8771	G
																								4.367	G									9.26797	N
																								44.0761	N									105.131	G
																								15.8899	G									43.1543	N
																								28.2529	N									10.719	G
																								18.7952	G									12.409	N
																																		11.1839	G
																																		15.6164	N
																																		6.79545	G
																																		15.273	N
																																		33.3913	G
																																		13.5214	N
																																		10.8508	G
																																		11.5745	N
																																		33.4738	G
																																		13.1252	N
																																		10.4328	G
																																		76.3776	N
																																		13.498	G
																																		118.071	N
																																		21.1248	G
																																		15.086	N
																																		9.131	G
																																		18.262	N
																																		46.9651	G
																																		27.8075	N
																																		1.588	G
																																		23.4794	N
																																		48.1343	G

## Sheet: wt_Chromosome I_right
Figure S15E Measurements (wt Chromosome I right part)
A - correspond to the left end position of each DNA molecule
N - correspond to unreplicated DNA length (kb)
G - correspond to replication track length (kb)
2801.9	A	1878.68	A	1584.88	A	3168.26	A	2088.04	A	3589.02	A	2779.87	A	2654.7	A	3161.09	A	1844.55	A	3811.39	A	1839.63	A	1945.73	A	3766.81	A	1319.8	A	3376.69	A	3711.29	A	3853.53	A	2642.81	A	3061	A	2233.39	A	3855.33	A	2932.47	A	3490.88	A
291.31	N	43.1638	N	115.88	N	2.382	G	6.36431	G	91.9496	N	35.7673	N	72.3465	N	108.441	N	41.0697	N	15.483	N	3.573	N	12.8747	G	40.13	G	45.5554	N	2.779	G	20.4145	N	23.423	G	5.57229	G	42.9995	N	152.275	G	1289.77	G	85.0767	G	1028.68	G
8.34653	G	1.985	G	4.367	G	57.3558	N	551.029	N	1.588	G	2.382	G	2.779	G	8.37472	G	5.02165	G	7.15712	G	4.95138	G	4.367	N	27.4649	N	16.4791	G	25.0896	N	6.749	G	5.558	N	4.367	N	60.3726	G	5.161	N	5.161	N	4.06766	N
380.351	N	226.56	N	223.94	N	1.985	G	1.985	G	321.111	N	239.649	N	600.854	N	54.5105	N	239.927	N	26.6109	N	10.4244	N	34.9138	G	28.5868	G	69.8518	N	1.985	G	11.91	N	25.408	G	33.0185	G	3.176	N	62.726	G	223.264	G	711.28	G
4.38486	G	1.588	G	6.749	G	63.2274	N	48.6587	N	1.588	G	4.764	G	4.47816	G	1.588	G	5.955	G	11.5197	G	3.176	G	38.611	N	17.9047	N	12.307	G	20.2915	N	1.985	G	54.8626	N	5.17609	N	17.468	G	5.558	N	7.146	N	4.8299	N
369.029	N	40.0998	N	240.539	N	5.955	G	1.588	G	78.3086	N	98.1618	N	10.322	N	153.814	N	196.811	N	139.808	N	56.8591	N	8.82928	G	9.131	G	29.012	N	37.5105	G	12.704	N	38.9397	G	12.3324	G	3.97	N	70.7009	G	77.3181	G	44.9063	G
2.779	G	4.367	G	1.588	G	256.427	N	436.392	N	1.985	G	2.382	G	41.0554	G	3.573	G	3.573	G	5.558	G	2.779	G	8.42156	N	93.5118	N	1.588	G	77.13	N	12.307	G	20.644	N	8.77013	N	30.9763	G	5.161	N	6.85341	N	5.955	N
43.3917	N	3.573	N	46.1056	N	1.985	G	1.985	G	7.146	N	6.93321	N	408.937	N	77.6834	N	31.0073	N	21.0477	N	16.722	N	2.382	G	12.7536	G	66.7182	N	16.277	G	17.9388	N	33.0415	G	40.7564	G	6.352	N	141.625	G	200.29	G	218.888	G
3.97	G	2.779	G	1.985	G	135.971	N	121.185	N	8.337	G	6.86095	G	5.955	G	2.382	G	3.97	G	9.99606	G	2.382	G	9.925	N	17.5399	N	12.4122	G	16.7744	N	6.749	G	12.704	N	32.5893	N	68.4138	G	4.764	N	7.32028	N	6.86969	N
492.601	N	471.187	N	53.2294	N	3.176	G	10.719	G	284.003	N	20.4868	N	60.4353	N	56.4006	N	26.6288	N	32.7013	N	9.18142	N	3.97	G	11.513	G	8.337	N	3.97	G	13.5576	N	4.367	G	8.734	G	5.558	N	12.704	G	38.1644	G	191.299	G
5.57229	G	1.985	G	5.955	G	72.2127	N	24.25	N	2.382	G	2.41495	G	4.52659	G	3.97	G	6.749	G	6.749	G	7.94	G	14.7894	N	31.4317	N	4.764	G	3.97	N	14.689	G	7.543	N	63.1992	N	104.456	G	4.764	N	24.857	N	6.40163	N
53.6097	N	6.40163	N	416.426	N	3.573	G	4.764	G	158.997	N	184.909	N	9.925	N	152.379	N	30.6218	N	51.1086	N	265.88	N	27.8206	G	20.247	G	19.4998	N	4.367	G	11.116	N	25.4501	G	60.1455	G	5.61437	N	92.5443	G	46.9369	G	33.824	G
1.588	G	3.573	G	2.382	G	47.1362	N	10.3526	N	6.36431	G	7.78755	G	1.985	G	8.13334	G	5.161	G	5.558	G	16.3544	G	4.367	N	36.0786	N	5.558	G	19.8659	N	18.659	G	6.749	N	4.367	N	158.558	G	7.146	N	8.4029	N
81.4704	N	240.828	N	53.2127	N	3.176	G	4.43131	G	76.334	N	42.7625	N	233.328	N	163.08	N	178.067	N	176.916	N	244.111	N	6.79545	G	11.116	G	4.367	N	7.146	G	6.40163	N	3.573	G	136.341	G	10.4308	N	3.97	G	27.5363	G
		5.558	G	3.76634	G	245.751	N			1.985	G	1.985	G	2.779	G	2.382	G	3.97	G	13.498	G	3.573	G	44.1575	N	28.9917	N	23.5667	G	10.322	N	7.146	G	11.116	N	8.337	N	79.8184	G	9.131	N	5.558	N
		263.01	N	295.619	N	2.779	G			169.621	N	443.188	N	36.6705	N	39.7711	N	6.352	N	21.8985	N	82.6248	N	3.66034	G	5.161	G	9.528	N	1.191	G	6.352	N	13.498	G	52.0308	G	4.764	N	73.0559	G	9.925	G
		3.573	G			433.464	N			1.588	G	3.27366	G	1.985	G	2.382	G	29.1517	G	7.94993	G	8.337	G	6.36431	N	34.936	N	3.97	G	5.161	N	5.161	G	24.6751	N	4.764	N	37.798	G	15.086	N
		154.154	N			2.51103	G			195.494	N	142.81	N	417.931	N	22.7763	N	12.3145	N	74.8508	N	67.5408	N	6.07291	G	1.985	G	26.3394	N	3.97	G	42.2932	N	1.191	G	22.2947	G	12.3134	N	1332.93	G
						17.6697	N			6.749	G	4.52659	G	13.2523	G	1.985	G	15.9245	G	5.161	G	3.573	G	91.5073	N	19.5574	N	1.588	G	8.734	N	19.5451	G	4.764	N	8.37472	N	75.5527	G	116.922	N
						8.05473	G			9.925	N	144.92	N	9.53634	N	49.7735	N	182.528	N	66.7992	N	42.9328	N	28.6833	G	37.0472	G	47.1358	N	7.146	G	27.4958	N	109.422	G	56.2879	G	5.161	N	4.367	G
						244.444	N			9.06391	G	1.985	G	7.94	G	3.97	G	8.77013	G	5.955	G	1.588	G	5.22174	N	93.8464	N	6.352	G	8.734	N	16.6645	G	38.197	N	34.9654	N	85.3693	G	9.131	N
						3.573	G			18.9274	N	13.6433	N	220.43	N	6.352	N	307.5	N	19.9143	N	59.178	N	24.3103	G	1.588	G	25.5458	N	11.513	G	7.70815	N	9.131	G	10.5932	G	5.161	N	1.985	G
						205.887	N			1.985	G	5.78032	G			3.573	G			4.38486	G	11.91	G	4.78067	N	45.7003	N	24.2305	G	11.1442	N	19.3601	G	3.97	N	4.91049	N	52.8379	G
										72.2302	N	167.109	N			10.7273	N			62.518	N	17.4922	N	20.2426	G	3.573	G	108.686	N	3.97	G	24.0733	N	6.76051	G	11.6928	G	6.352	N
										7.63629	G	1.588	G			2.779	G			3.98985	G	2.779	G	9.528	N	37.8043	N	2.382	G	37.5812	N	22.4365	G	5.955	N	11.9695	N	10.7265	G
										12.7596	N	125.838	N			54.0448	N			4.764	N	44.4711	N	28.1934	G	12.307	G	17.0758	N	16.3659	G	14.3472	N	1.588	G	14.6346	G	5.57229	N
										1.588	G	4.8299	G			3.176	G			6.749	G	1.588	G	58.4908	N	74.3124	N	21.4968	G	13.9458	N	16.9737	G	15.2388	N	9.82138	N	184.773	G
										80.6061	N	47.9759	N			9.53634	N			19.453	N	45.7423	N	2.382	G	5.558	G	12.307	N	21.5039	G	18.391	N	2.779	G	56.8448	G	5.161	N
										4.764	G	8.42156	G			1.985	G			4.367	G	5.558	G	11.5745	N	184.304	N	21.0747	G	7.543	N	22.5321	G	31.8704	N	27.8091	N	77.7159	G
										116.88	N	157.583	N			163.572	N			57.6154	N	52.1606	N	4.367	G	27.9746	G	42.8816	N	22.232	G	20.5725	N	31.8084	G	8.42156	G	5.955	N
										1.588	G	17.1139	G							5.9681	G	3.97	G	3.573	N	5.955	N	11.91	G	6.36431	N	3.97	G	10.719	N	11.6222	N	32.186	G
										73.0377	N	64.21	N							54.4323	N	46.8639	N	5.955	G	20.3971	G	10.719	N	3.573	G	19.4054	N	3.97	G	10.5932	G	4.367	N
										2.13784	G	8.56805	G							5.161	G	2.382	G	28.663	N	25.0201	N	5.161	G	9.95676	N	5.161	G	9.925	N	6.0078	N	159.451	G
										11.6174	N	142.565	N							102.967	N	22.4241	N	14.2976	G	16.3016	G	281.303	N	4.764	G	69.899	N	1.985	G	30.4443	G	3.573	N
												1.588	G							5.955	G	12.704	G	58.8739	N	13.1101	N	5.558	G	16.6863	N	32.793	G	44.1043	N	29.9465	N	66.7742	G
												143.206	N							33.8367	N	12.307	N	1.985	G	6.749	G	69.2162	N	56.4423	G	62.3655	N	19.453	G	5.61874	G	10.3295	N
												4.764	G							11.1795	G	2.779	G	66.2676	N	15.9511	N	2.779	G	31.9581	N	6.352	G	33.479	N	9.95676	N	40.6528	G
												122.855	N							3.176	N	61.5731	N	4.367	G	2.779	G	31.9402	N	17.468	G	92.0421	N	86.0708	G	6.85341	G	4.764	N
												2.382	G							6.749	G	2.779	G	5.161	N	16.3076	N	4.14468	G	15.086	N	2.382	G	44.6931	N	4.38486	N	185.918	G
																				13.9458	N	170.859	N	3.176	G	7.07216	G	13.2622	N	2.382	G	21.679	N	1.588	G	1.985	G
																				4.04861	G	5.20665	G	9.131	N			1.985	G	15.4921	N	8.3767	G	38.5376	N	4.52659	N
																				131.86	N	70.3377	N	4.367	G			36.0047	N	1.191	G	35.7673	N			14.8069	G
																				5.161	G	8.42156	G	7.543	N			4.367	G	15.2067	N	15.9689	G			3.97	N
																				17.9353	N	35.6149	N	21.9676	G			19.2577	N	7.146	G	16.7451	N			7.15712	G
																				7.55332	G	6.7891	G	5.161	N			7.12377	G	6.07489	N	29.2307	G			19.2616	N
																				45.6919	N	31.2133	N	3.176	G			53.8133	N	5.955	G	23.5584	N			55.077	G
																				6.749	G	6.7891	G	5.558	N			21.966	G	22.2725	N	2.779	G			42.4476	N
																				72.1266	N	3.59563	N	1.985	G			32.581	N	8.734	G	16.8165	N			99.834	G
																				5.3996	G	1.985	G	9.131	N			16.7101	G	69.2555	N	8.337	G			6.54732	N
																				15.2126	N	61.7938	N	16.3512	G			23.9387	N	5.161	G	26.4529	N			7.34768	G
																				5.57229	G	3.176	G	82.6093	N			6.352	G	65.3744	N	14.0359	G			4.8299	N
																				83.9294	N	63.9444	N	8.81499	G			15.9006	N	3.97	G	79.4588	N			26.0349	G
																				5.558	G	10.719	G	36.998	N			4.367	G	13.1101	N	8.337	G			11.2287	N
																				147.913	N	14.2976	N	20.7051	G			6.0078	N	6.749	G	48.2851	N			1.985	G
																				2.779	G	6.749	G	7.55332	N			25.5414	G	15.0912	N	9.528	G			32.8025	N
																				74.0421	N	31.862	N	19.0933	G			21.438	N	6.749	G	13.101	N			20.7393	G
																				4.38486	G	6.83277	G	84.6221	N			34.142	G	5.558	N	13.498	G			10.7849	N
																				46.5546	N	30.9763	N	9.53634	G			12.704	N	11.513	G	12.8354	N			31.8604	G
																						4.367	G	47.3248	N			23.0296	G			32.8847	G			82.5506	N
																						13.101	N	8.37472	G			5.955	N			10.719	N			7.146	G
																						11.5745	G	118.607	N			13.101	G			129.369	G			5.57229	N
																						12.3511	N	3.573	G			52.0102	N			11.513	N			23.0601	G
																						3.98985	G	6.46276	N			3.97	G			42.479	G			24.6283	N
																						11.513	N	29.8429	G			11.9386	N							60.6028	G
																						1.985	G	7.543	N			7.94	G							114.491	N
																						3.176	N	1.588	G			9.528	N							5.61437	G
																						1.588	G	20.0624	N			18.0798	G							17.0726	N
																						7.543	N	3.573	G			7.146	N							2.779	G
																						7.146	G	4.764	N			80.4755	G							96.7612	N
																						10.322	N	5.955	G			34.56	N							37.3664	G
																						1.588	G	65.6305	N			103.636	G							21.4968	N
																						4.764	N	7.15712	G			11.91	N							46.9306	G
																						8.734	G	65.715	N			11.3093	G							8.734	N
																						8.37472	N	17.1909	G			8.734	N							30.2566	G
																						9.925	G	6.749	N			11.943	G							5.955	N
																						21.835	N	12.3348	G			33.8748	N							18.2791	G
																						7.94	G	184.481	N			20.6928	G							31.4289	N
																						26.9988	N	1.985	G			7.60493	N							66.4245	G
																						3.97	G	196.606	N			13.9939	G							6.76051	N
																						4.764	N	1.985	G			17.15	N							21.471	G
																						3.573	G	21.9251	N			6.0078	G							22.6846	N
																								1.985	G			15.483	N							22.3559	G
																								18.7281	N			44.938	G							6.36431	N
																								5.161	G			22.8005	N							7.146	G
																								65.7075	N			12.1458	G							4.367	N
																								1.985	G			57.6706	N							13.9414	G
																								118.952	N			23.4032	G							7.146	N
																								3.573	G			7.543	N							37.8051	G
																								166.141	N			11.91	G							4.764	N
																								1.985	G			14.3658	N							11.5404	G
																								68.754	N			6.48499	G							6.749	N
																								3.20061	G			7.27503	N							1.985	G
																								44.8991	N			59.3694	G							6.749	N
																								6.40163	G			11.9203	N							8.734	G
																								48.8909	N			3.27962	G							16.2818	N
																								3.59483	G			45.4136	N							26.6732	G
																								129.635	N			5.29677	G
																								11.9596	G			28.7349	N
																								18.659	N			6.07291	G
																								2.382	G			46.6229	N
																								39.7341	N			8.734	G
																								1.588	G			15.5032	N
																								9.131	N			9.65941	G
																								27.5673	G			17.4394	N
																								134.989	N			14.689	G
																								12.8084	G			22.2638	N
																								25.4203	N			4.367	G
																								3.02355	G			11.0965	N
																								8.337	N			24.1844	G
																								1.588	G			35.7852	N
																								6.352	N			20.9727	G
																								44.8324	G			13.6445	N
																								6.749	N			9.63201	G
																								20.2625	G			44.4346	N
																								3.97	N			40.4531	G
																								15.107	G			36.5363	N
																								6.749	N			25.4092	G
																								31.3856	G			38.4911	N
																								9.95676	N			9.26797	G
																								8.337	G			10.8373	N
																								27.046	N			4.28641	G
																								7.94993	G			19.4808	N
																								4.764	N			3.66034	G
																								8.337	G			7.32028	N
																								27.0544	N			4.367	G
																								7.15712	G			29.9981	N
																								5.955	N			63.4184	G
																								5.161	G			30.2554	N
																								7.94	N			9.34538	G
																								20.6865	G			120.684	N
																								29.0008	N			16.3949	G
																								1.588	G			24.0781	N
																								17.8825	N			16.9324	G
																								1.588	G			9.53634	N
																								9.131	N			5.558	G
																								30.9894	G			32.6671	N
																								15.4897	N			6.352	G
																								3.573	G			125.826	N
																								30.2101	N			24.7764	G
																								3.176	G			28.2148	N
																								47.37	N			8.734	G
																								7.94	G			28.2894	N
																								59.5992	N			7.543	G
																								1.985	G			41.8021	N
																								12.8029	N			12.307	G
																								25.0614	G			19.318	N
																								6.36431	N			2.779	G
																								3.573	G
																								19.06	N
																								6.352	G
																								9.16554	N
																								3.176	G
																								65.9643	N
																								1.588	G
																								9.93294	N
																								10.7265	G
																								25.0324	N
																								2.51103	G
																								13.1252	N
																								2.779	G
																								5.57229	N
																								5.955	G
																								6.76051	N
																								31.4265	G
																								7.15712	N
																								10.7484	G
																								6.76051	N
																								5.558	G
																								6.01137	N
																								5.17609	G
																								73.1361	N
																								6.36431	G
																								95.1279	N
																								14.7104	G
																								7.94	N
																								1.588	G
																								5.558	N
																								15.8999	G
																								21.0561	N
																								1.588	G
																								71.9678	N

## Sheet: wt_Chromosome II_left
Figure S15F Measurements (wt Chromosome II left part)
A - correspond to the left end position of each DNA molecule
N - correspond to unreplicated DNA length (kb)
G - correspond to replication track length (kb)
248.477	A	5.62941	A	583.438	A	1	A	1	A	219.599	A	514.531	A	1	A	1	A	141.392	A	531.6	A
69.0169	N	115.374	N	88.3853	N	16.7133	G	34.3715	G	8.41243	G	125.487	N	31.3745	N	205.197	G	1463.31	G	1631.76	G
2.51103	G	4.367	G	4.764	G	209.531	N	96.1212	N	10.0512	N	15.5032	G	4.367	G	4.8299	N	16.2965	N
36.53	N	359.703	N	71.2436	N	4.764	G	7.58469	G	13.6632	G	10.3907	N	31.3654	N	155.925	G	478.654	G
2.13784	G	2.779	G	1.985	G	485.671	N	165.61	N	5.161	N	8.337	G	505.801	G	5.161	N	4.04861	N
791.64	N	54.1691	N	130.039	N	5.558	G	11.9985	G	24.4969	G	39.7266	N	8.734	N	162.996	G	348.95	G
5.558	G	3.573	G	1.588	G	230.088	N	290.141	N	8.92734	N	96.7418	G	207.454	G	5.558	N
11.513	N	605.267	N	201.936	N	2.779	G	2.382	G	3.97	G	12.1006	N	59.7537	N	276.579	G
3.176	G	2.382	G	1.588	G	98.4806	N	155.666	N	22.2923	N	7.19205	G	5.17609	G	5.955	N
255.342	N	4.764	N	127.764	N	21.438	G	9.131	G	4.764	G	14.641	N	5.97167	N	1.985	G
		2.89016	G	2.80719	G	12.307	N	204.244	N	34.1595	N	8.81499	G	13.498	G	9.17268	N
		403.728	N	240.367	N	1.588	G	10.322	G	4.367	G	300.068	N	6.749	N	163.059	G
		1.985	G	1.985	G	106.44	N	152.418	N	3.97	N	6.40163	G	4.367	G	5.558	N
		89.402	N	99.9563	N	1.588	G	6.08402	G	14.7041	G	5.955	N	7.9797	N	58.0533	G
		1.985	G	2.382	G	163.139	N	187.263	N	20.6539	N	5.955	G	512.311	G	5.161	N
		62.0146	N	21.8425	N					15.6092	G	5.17609	N	53.6418	N	129.557	G
										39.7056	N	3.573	G	86.2447	G	5.161	N
										15.483	G	71.2063	N	4.764	N	83.0218	G
										30.5734	N	13.3027	G	454.941	G	6.749	N
										3.97	G	104.502	N	5.161	N	485.413	G
										26.9988	N	5.17609	G	11.2669	G	4.367	N
										9.528	G	11.5745	N			37.8075	G
										8.337	N	3.98985	G			3.97	N
										34.9856	G	39.5611	N			297.583	G
										7.146	N	7.55332	G			4.764	N
										20.247	G	66.9683	N			6.36431	G
										7.15712	N	7.55332	G			5.558	N
										21.047	G	12.7973	N			314.538	G
										8.337	N	87.8636	G
										14.292	G
										15.8999	N
										37.3835	G
										32.2495	N
										3.176	G
										42.6231	N
										13.498	G
										8.337	N
										19.8702	G
										198.295	N
										12.7731	G
										339.364	N
										13.895	G
										6.749	N
										32.2261	G
										37.7535	N
										9.528	G
										35.3425	N
										9.925	G
										32.951	N
										9.131	G
										26.2139	N
										3.573	G
										81.435	N
										1.588	G
										19.4804	N
										5.17609	G
										15.1928	N
										8.734	G
										52.8351	N

## Sheet: wt_Chromosome II_right
Figure S15G Measurements (wt Chromosome II right part)
A - correspond to the left end position of each DNA molecule
N - correspond to unreplicated DNA length (kb)
G - correspond to replication track length (kb)
3096.28	A	2290.1	A	2785.22	A	3079.94	A	3210.24	A	2967.72	A	3005.74	A	3161.54	A	3134.53	A	2440.14	A	2067.94	A	2717.22	A	2996.82	A	2930.05	A	2891.5	A	3139.27	A	3028.3	A	3372.63	A	3154.43	A	2671.84	A	2795.95	A	3339.75	A	2997.19	A	3212.22	A	3552.49	A
761.777	N	316.96	N	39.8572	N	20.2903	N	85.386	N	10.8687	G	2.779	G	99.14	G	49.8489	G	44.4743	N	175.326	N	6.352	G	73.5069	N	31.92	N	66.5344	N	55.6848	N	2.382	G	7.52077	G	24.3159	G	60.4671	N	124.029	G	167.83	G	66.6067	G	66.4157	G	297.111	G
1.985	G	2.779	G	3.573	G	3.573	G	6.352	G	433.134	N	7.21746	N	11.5745	N	5.61437	N	3.573	G	4.04861	G	16.4005	N	28.6003	G	3.573	G	10.0036	G	46.0703	G	9.53673	N	13.5818	N	18.6634	N	105.371	G	14.292	N	5.57229	N	13.9176	N	5.9681	N	4.78067	N
162.744	N	83.1175	N	499.783	N	304.284	N	408.066	N	10.7488	G	2.382	G	2.41495	G	9.528	G	38.9628	N	145.797	N	3.97	G	39.309	N	6.36431	N	11.2236	N	12.3654	N	8.74313	G	3.97	G	7.25716	G	25.0146	N	47.3073	G	130.052	G	607.461	G	448.728	G	26.2322	G
		2.382	G	7.58469	G	4.367	G	4.8299	G	78.6528	N	23.9002	N	77.2435	N	42.876	N	5.955	G	3.176	G	31.517	N	7.543	G	3.176	G	1.985	G	15.109	G	16.674	N	24.248	N	17.4755	N	16.2965	G	5.558	N	5.558	N	5.9681	N	11.1442	N	3.98985	N
		104.536	N	428.29	N	187.609	N	50.4952	N	2.382	G	2.779	G	7.146	G	3.573	G	6.40163	N	100.481	N	20.3975	G	85.0596	N	69.0141	N	35.8519	N	29.0779	N	3.176	G	3.573	G	25.011	G	10.322	N	508.68	G	438.572	G	25.4576	G	527.517	G	523.521	G
		2.779	G			4.367	G	2.779	G	737.358	N	125.251	N	165.892	N	39.7087	N	2.382	G	2.382	G	11.9167	N	8.734	G	1.985	G	5.558	G	4.367	G	15.0912	N	67.8108	N	63.5363	N	11.3375	G	5.558	N	3.97	N	4.764	N
		500.221	N			210.865	N	139.773	N	2.41495	G	11.5348	G	5.161	G	16.3429	G	13.895	N	42.1392	N	5.02165	G	6.36431	N	107.646	N	15.5156	N	29.8044	N	9.93294	G	4.764	G	3.176	G	12.7973	N	294.455	G	85.0906	G	567.561	G
		5.57229	G			3.573	G	1.588	G	152.224	N	73.6685	N	38.6456	N	5.558	N	17.8968	G	7.06541	G	16.8582	N	8.34653	G	1.985	G	8.734	G	4.367	G	132.287	N	27.1084	N	19.0675	N	39.6674	G	18.3462	N	5.161	N	4.91049	N
		320.482	N			503.119	N	379.763	N			5.558	G	16.6788	G	18.3978	G	99.7943	N	26.6256	N	6.40163	G	48.8385	N	21.1355	N	5.57229	N	5.161	N	13.5214	G	9.131	G	7.543	G	4.367	N	116.011	G	28.2001	G	151.187	G
		2.779	G									46.4621	N	150.08	N	137.899	N	9.131	G	1.985	G	53.2123	N	41.4651	G	17.071	G	12.4031	G	75.0505	G	84.1664	N	3.97	N	34.5823	N	40.1748	G			9.13973	N
		285.619	N									6.07291	G	14.3527	G	2.779	G	3.573	N	13.504	N	1.985	G	44.2345	N	4.367	N	4.367	N	3.573	N	2.80719	G	34.2051	G	28.9941	G	57.6067	N			11.91	G
												7.94993	N	21.5297	N	5.955	N	7.94	G	15.5294	G	42.1431	N	4.764	G	5.59095	G	6.352	G	10.395	G	168.442	N	37.0218	N	8.337	N	28.7289	G
												5.161	G	11.1442	G	3.97	G	37.3351	N	9.93294	N	1.985	G	26.229	N	68.1665	N	40.1319	N	236.499	N	1.588	G	1.985	G	3.97	G	10.7321	N
												102.987	N	39.5114	N	12.704	N	8.42434	G	17.468	G	36.6959	N	12.704	G	5.161	G	8.74313	G	4.367	G	25.4215	N	4.764	N	17.865	N	286.917	G
												1.985	G	6.749	G	7.56761	G	49.708	N	7.94	N	10.0985	G	55.3803	N	5.57229	N	77.1462	N	20.2669	N	9.5939	G	17.5367	G	2.779	G	31.76	N
												37.322	N	182.726	N	100.588	N	15.8999	G	14.8327	G	28.9897	N	7.94	G	1.588	G	9.96271	G	21.1724	G	13.504	N	20.7484	N	5.558	N	62.3758	G
												7.17061	G	27.5296	G	4.367	G	17.1861	N	18.2664	N	7.25518	G	11.116	N	15.9276	N	5.161	N	58.8056	N	3.97	G	1.588	G	19.854	G	30.172	N
												16.3373	N	153.585	N	3.97	N	1.588	G	10.322	G	70.3405	N	1.985	G	2.382	G	2.382	G	14.714	G	26.599	N	7.543	N	13.107	N	9.528	G
												5.955	G	5.9681	G	8.337	G	8.337	N	24.6215	N	14.5207	G	18.6896	N	8.7737	N	99.5871	N	25.4207	N	3.176	G	22.6326	G	19.4693	G	16.674	N
												11.7667	N	33.4341	N	238.106	N	17.8995	G	5.558	G	49.7473	N	8.78879	G	5.9681	G	21.0013	G	5.161	G	92.578	N	22.2836	N	18.2664	N	45.4168	G
												3.176	G	9.93294	G	5.61437	G	33.7696	N	67.1248	N	21.4646	G	12.7104	N	13.5123	N	17.5514	N	24.6323	N	4.764	G	32.8164	G	2.779	G	3.97	N
												203.505	N	113.537	N	151.492	N	13.895	G	9.528	G	11.9267	N	28.5776	G	3.66034	G	25.5132	G	40.5293	G	25.8177	N	11.513	N	5.955	N	54.5526	G
												5.65566	G	3.573	G	3.39197	G	63.5716	N	10.7313	N	7.94	G	8.734	N	24.7704	N	14.6977	N	18.268	N	13.101	G	6.352	G	7.94	G	5.161	N
												3.97	N	58.8699	N	8.152	N	7.94	G	11.6039	G	182.161	N	19.341	G	15.9415	G	1.588	G	12.7286	G	6.352	N	13.5421	N	12.7104	N	23.0296	G
												5.161	G			3.97	G	7.146	N	19.453	N	2.779	G	21.438	N	4.764	N	21.8449	N	35.7336	N	15.086	G	33.8323	G	37.3371	G	24.614	N
												46.5284	N			4.49603	N	13.9006	G	3.573	G	7.55332	N	10.322	G	13.9446	G	25.4886	G	7.94	G	12.7104	N	3.97	N	6.749	N	19.056	G
												3.176	G			3.573	G	116.652	N	102.141	N	5.955	G	33.7545	N	44.1968	N	25.8344	N	26.2068	N	9.131	G	38.5118	G	5.161	G	11.116	N
												56.158	N			186.957	N	5.558	G	11.9366	G	9.53634	N	18.2664	G	23.8712	G	19.1418	G	27.0075	G	81.0749	N	14.292	N	21.9394	N	45.2834	G
												6.90184	G			71.2234	G	23.953	N	7.94	N	7.17895	G	57.9977	N	81.699	N	117.734	N	5.955	N	7.543	G	28.1981	G	4.764	G	10.719	N
												11.0001	N			121.326	N	13.155	G	5.161	G	18.4109	N	14.7069	G	15.086	G	25.0856	G	12.307	G	20.6488	N	46.4522	N	9.131	N	148.942	G
												1.985	G			3.66034	G	23.0395	N	45.287	N	9.15085	G	173.664	N	29.1589	N	16.3052	N	15.9673	N	16.6788	G	21.1557	G	1.985	G	17.9718	N
												343.353	N					16.674	G	9.20961	G	24.6529	N	7.94	G	5.161	G	39.0501	G	3.97	G	7.15712	N	13.895	N	21.8695	N	12.1581	G
												6.30476	G					15.107	N	37.0667	N	10.3363	G	18.6908	N	21.5698	N	14.6946	N	5.161	N	6.352	G	21.8767	G	13.9196	G	19.453	N
												7.94	N					17.684	G	6.749	G	47.6571	N	3.97	G	21.4813	G	4.764	G	1.985	G	41.6965	N	37.3962	N	16.3207	N	30.569	G
												8.337	G					42.4949	N	19.0651	N	10.322	G	26.25	N	17.5478	N	7.9797	N	30.6536	N	63.9666	G	15.88	G	25.5041	G	9.131	N
												35.7502	N					1.588	G	15.5072	G	5.161	N			13.9081	G	1.588	G	20.725	G	4.367	N	7.543	N	70.8355	N	95.3852	G
																		5.955	N	205.745	N	2.382	G			22.2638	N	13.1474	N			77.44	G	20.7782	G	47.3315	G	9.131	N
																		19.85	G	9.131	G	58.8926	N			7.63629	G	13.9478	G			14.2976	N	112.577	N	25.4668	N	42.1173	G
																		25.8173	N	52.4131	N	15.144	G			17.1448	N	56.9993	N			42.9459	G	7.15712	G	14.7462	G	33.4917	N
																		15.8848	G	3.573	G	3.176	N			4.78067	G	13.9462	G			10.7265	N	5.161	N	9.93532	N	33.8216	G
																		15.086	N	148.978	N	5.955	G			48.9989	N	8.734	N			140.249	G	18.3227	G	17.071	G	61.9626	N
																		3.573	G	10.8167	G	13.101	N			30.2184	G					17.4859	N	11.91	N	29.0001	N	3.97	G
																		56.4018	N	49.3677	N	33.4107	G			11.9695	N					17.865	G	5.955	G	25.89	G	5.161	N
																		2.41495	G	1.588	G	35.7002	N			21.5698	G					38.513	N	7.543	N	24.6172	N	5.955	G
																		79.1511	N	12.4233	N	4.15738	G			44.5168	N							2.382	G	46.1195	G	8.40846	N
																		7.146	G	23.4333	G	12.222	N			5.955	G							19.5002	N	15.564	N	23.0375	G
																		5.57229	N	18.3017	N	4.367	G			6.749	N							4.764	G	5.955	G	3.573	N
																		5.955	G	36.6213	G	73.0825	N			15.5823	G							49.3094	N	5.558	N	161.509	G
																		16.6788	N	13.895	N	5.558	G			34.4437	N									27.4053	G
																		15.0912	G	8.337	G	16.6883	N			9.13973	G									54.4351	N
																		92.1929	N	24.7029	N	21.0632	G			79.4453	N									5.558	G
																		11.116	G	47.3184	G	23.8379	N			1.588	G									8.88168	N
																		14.3305	N	6.36431	N	3.573	G			36.2068	N									1.588	G
																		3.176	G	12.3157	G	31.3844	N			14.1249	G									25.0578	N
																		31.8759	N	42.2614	N	26.6879	G			21.5904	N									31.0736	G
																		8.1115	G	9.13973	G	109.208	N			70.0634	G									66.8111	N
																		31.7926	N	15.4882	N	2.779	G			12.3646	N									9.528	G
																		11.9167	G	21.0652	G	29.7945	N			2.779	G									6.352	N
																		31.7719	N	46.2334	N	19.1243	G			21.4801	N									5.955	G
																		39.731	G	8.16669	G	70.7176	N			17.1512	G									32.161	N
																		79.8379	N	11.9167	N	7.96461	G			148.039	N
																		17.9365	G	10.351	G	118.548	N
																		17.123	N	7.94	N
																		3.176	G	12.1363	G
																		10.9767	N
																		6.749	G
																		13.895	N
																		7.9793	G
																		187.173	N
																		6.352	G
																		11.91	N
																		3.98985	G
																		113.702	N
																		13.155	G
																		26.6748	N
																		4.764	G
																		129.457	N

## Sheet: wt_Chromosome III
Figure S15H Measurements (wt Chromosome III)
A - correspond to the left end position of each DNA molecule
N - correspond to unreplicated DNA length (kb)
G - correspond to replication track length (kb)
2688.4	A	580.7	A	1507.05	A	1071.17	A	1007.34	A	926.675	A	2036.84	A	818.98	A	729.913	A	1449.71	A	1786.65	A	893.329	A	327.452	A	2123.72	A	352.023	A	1585.45	A	760.074	A	715.379	A	291.608	A	1488.45	A	1846.38	A	1974.79	A
818.608	N	629.792	N	339.777	N	183.859	N	122.977	N	58.8418	N	85.1855	N	377.165	N	52.1289	N	71.5827	N	166.859	N	6.749	N	61.6287	N	279.135	N	157.992	N	13.9458	G	11.5404	N	8.337	G	15.086	G	10.794	G	346.026	G	624.641	G
5.955	G	3.176	G	3.97	G	5.161	G	1.985	G	5.161	G	11.2287	G	7.146	G	1.985	G	5.78032	G	1.985	G	5.558	G	1.588	G	3.176	G	1.985	G	15.9296	N	11.9695	G	9.528	N	4.367	N	4.43846	N	9.131	N	4.367	N
249.641	N	48.5333	N	475.709	N	27.441	N	234.156	N	116.088	N	455.115	N	683.652	N	346.469	N	8.87732	N	98.4774	N	646.277	N	596.23	N	815.955	N	69.3817	N	48.7627	G	11.1819	N	2.382	G	21.041	G	194.58	G	33.4139	G	717.413	G
		1.588	G	1.985	G	4.367	G	2.382	G	6.749	G	13.101	G	5.558	G	4.367	G	1.588	G	6.352	G	1.985	G	3.97	G	20.644	G	3.20061	G	3.59483	N	9.55619	G	5.558	N	7.146	N	5.558	N	3.97	N	7.146	N
		288.594	N	162.405	N	160.303	N	116.331	N	478.298	N	121.051	N	311.865	N	69.9975	N	104.899	N	34.5974	N	375.681	N	15.88	N	3.97	N	32.4012	N	16.4223	G	8.337	N	34.9777	G	10.322	G	5.558	G	19.9485	G	114.009	G
		6.352	G	4.764	G	3.573	G	1.588	G	4.367	G	1.985	G	1.588	G	5.161	G	2.382	G	2.382	G	82.3696	G	3.176	G	13.5766	G	13.101	G	5.61557	N	11.513	G	4.367	N	5.161	N	4.367	N	7.146	N	20.247	N
		626.241	N	84.027	N	12.7104	N	207.077	N	168.341	N	77.2991	N	882.649	N	162.356	N	26.7602	N	8.92932	N	262.379	N	19.4693	N	6.352	N	24.8181	N	82.5875	G	8.734	N	3.97	G	35.0218	G	62.7923	G	423.022	G
				2.382	G	1.588	G	4.367	G	2.382	G	2.779	G	65.5836	G	5.955	G	21.4122	G	1.588	G	1.985	G	5.955	G	71.1682	G	1.588	G	10.7849	N	37.5352	G	15.483	N	15.483	N	6.36431	N	6.749	N
				138.717	N	8.81499	N	239.701	N	88.8542	N	398.104	N	51.6199	N	9.95676	N	154.259	N	256.753	N	810.486	N	36.6248	N	4.44561	N	21.868	N	46.05	G	6.352	N	4.764	G	22.232	G	38.2672	G	171.488	G
				5.955	G	1.588	G	5.955	G	4.764	G	8.337	G	3.573	G	4.764	G	9.528	G	5.955	G	34.1626	G	2.779	G	14.292	G	9.528	G	30.1716	N	14.292	G	6.352	N	4.367	N	5.558	N	6.352	N
				24.3151	N	19.8567	N	9.131	N	123.365	N	47.1692	N	373.598	N	11.1442	N	236.597	N	78.0049	N	274.684	N	47.2898	N	7.146	N	268.394	N	22.4051	G	10.7956	N	3.176	G	5.955	G	156.618	G	218.017	G
				5.161	G	3.176	G	2.779	G	4.764	G	3.97	G	3.176	G	3.573	G	1.588	G	2.779	G	9.528	G	11.116	G	1.985	G	3.97	G	3.59483	N	9.50577	G	19.056	N	15.934	N	4.764	N	5.558	N
				23.057	N	376.455	N	202.539	N	97.6553	N	133.592	N	5.161	N	82.7809	N	398.95	N	94.594	N	406.984	N	87.3908	N	4.367	N	47.2926	N	26.0511	G	13.504	N	29.378	G	17.6153	G	17.1139	G	21.041	G
				5.955	G	1.985	G	6.76051	G	1.985	G	4.367	G	1.985	G	1.588	G			12.307	G			7.146	G	24.217	G	14.689	G	4.8299	N	1.985	G	7.543	N	5.955	N	9.53634	N	6.352	N
				430.651	N	57.8893	N	5.9681	N	75.6118	N	93.6618	N	20.247	N	68.2225	N			19.8869	N			28.187	N	110.883	N	15.086	N	57.8862	G	11.9866	N	20.4403	G	14.689	G	261.193	G	117.458	G
						2.13784	G	17.5188	G	13.1355	G					1.985	G			3.573	G			3.97	G	2.779	G	9.528	G	51.2487	N	14.3801	G	47.7261	N	4.764	N	13.9176	N
						19.0107	N	655.956	N	169.415	N					145.627	N			6.749	N			10.4018	N	44.882	N	46.1004	N	82.048	G	9.131	N	18.7368	G	23.026	G	5.558	G
						5.161	G	3.176	G							13.5504	G			6.352	G			1.985	G			7.31036	G	18.6725	N	45.5295	G	4.764	N	7.543	N	3.573	N
						22.7989	N	68.945	N							62.2309	N			74.3811	N			36.5621	N			21.1009	N	20.3474	G	6.85341	N	12.4392	G	125.477	G	3.97	G
						6.352	G	10.3526	G							3.176	G			11.513	G			3.97	G			6.352	G	45.2659	N	15.6152	G	5.558	N	5.558	N	6.352	N
						5.79739	N	206.49	N							369.519	N			227.239	N			194.373	N			56.4709	N	7.9797	G	7.55332	N	41.8803	G	3.97	G	32.5949	G
						1.985	G									1.588	G			2.382	G			4.367	G			8.337	G	24.3988	N	1.985	G	5.558	N	3.97	N	4.367	N
						104.43	N									223.303	N			315.675	N			17.468	N			3.97	N	4.78067	G	6.76051	N	89.4596	G	16.277	G	48.0541	G
						2.41495	G									10.3538	G			4.764	G			3.573	G			31.4031	G	36.1306	N	15.4882	G	5.558	N	5.161	N	4.367	N
						190.462	N									23.2944	N			6.352	N			8.337	N			11.5404	N	4.04861	G	5.955	N	1040.66	G	113.274	G	417.428	G
						1.985	G									6.352	G			3.97	G			7.73038	G			18.3323	G	15.7303	N	13.101	G	4.367	N	8.337	N
						319.776	N									321.668	N			6.749	N			133.541	N			24.2464	N	26.1087	G	4.764	N	61.2095	G	7.543	G
																								5.955	G			11.513	G	70.2309	N	38.1985	G	7.146	N	5.955	N
																								51.2448	N			12.3392	N	110.831	G	7.63629	N	17.468	G	21.203	G
																								6.352	G			8.337	G	13.0045	N	4.764	G	4.764	N	8.734	N
																								7.146	N			13.155	N	9.65941	G	4.764	N	57.9652	G	14.689	G
																								2.779	G			9.131	G	83.9024	N	18.821	G	5.161	N	4.367	N
																								105.23	N			4.764	N	76.831	G	4.764	N	9.528	G	507.681	G
																								4.764	G			10.719	G	41.444	N	134.525	G	5.161	N	7.146	N
																								15.3381	N			8.734	N	48.9259	G	5.558	N	79.907	G	69.5179	G
																								3.573	G			6.352	G	7.24446	N	16.277	G			4.367	N
																								42.5517	N			24.2301	N	27.875	G	4.367	N			46.052	G
																								4.764	G			11.9366	G	16.0575	N	64.4172	G			5.558	N
																												30.6952	N	27.2314	G	5.8617	N			104.836	G
																												15.483	G	13.5909	N	8.337	G			5.161	N
																												6.749	N	9.56095	G	6.352	N			106.037	G
																												20.247	G	23.4377	N	51.0621	G			4.367	N
																												9.528	N	41.949	G	5.558	N			238.67	G
																												13.2189	G	5.61437	N	54.491	G			5.161	N
																												5.161	N	15.6096	G	8.337	N			20.644	G
																												16.277	G	5.68425	N	10.719	G			5.161	N
																												17.071	N	3.27366	G	6.352	N			126.694	G
																												3.573	G	3.59483	N	85.517	G			5.558	N
																												75.5277	N	54.813	G	4.764	N			4.764	G
																												32.1967	G	24.7756	N	8.337	G			11.513	N
																												47.276	N	35.4874	G	6.352	N			21.5114	G
																												4.764	G	21.623	N	12.0942	G			5.955	N
																												7.543	N	13.5504	G	4.764	N			150.162	G
																												11.116	G	17.2381	N	15.5048	G			3.97	N
																												14.3428	N	20.7051	G	4.764	N			49.3102	G
																												12.704	G	17.975	N	52.109	G			7.543	N
																												7.94	N	15.9594	G	5.161	N			177.127	G
																												6.749	G	19.9135	N	42.639	G
																												10.322	N	21.1343	G	7.63629	N
																														21.4721	N	3.97	G
																														4.367	G	6.79545	N
																														11.1231	N	18.7293	G
																														1.985	G	5.57229	N
																														28.0433	N	85.3923	G
																														32.2864	G	4.367	N
																														53.5168	N	191.36	G
																														4.43846	G	14.5596	N
																														17.1127	N	2.89016	G
																														22.2638	G	3.573	N
																														17.5085	N	21.5893	G
																														13.504	G	3.97	N
																														23.8498	N	8.734	G
																														61.6422	G	5.558	N
																														40.101	N
																														5.161	G
																														404.46	N

## Sheet: clr3∆clr4∆_50%
Figure S15I Measurements (clr3∆clr4∆ 50% DNA synthesis)
A - correspond to the left end position of each DNA molecule
N - correspond to unreplicated DNA length (kb)
G - correspond to replication track length (kb)
1	A	1	A	1	A	1	A	1	A	1	A	1	A	1	A	1	A	1	A	1	A	1	A	1	A	1	A	1	A	1	A	1	A	1	A
35.4112	N	91	N	91.071	N	5.291	G	26.987	N	19.042	N	5.853	N	12.3558	N	14.118	N	70.8685	N	99.99	N	25.7339	N	15.2778	N	25.129	N	19.72	N	138.413	N	46.958	N	3.573	N
6.16303	G	2.695	G	3.176	G	55	N	5.109	G	8.895	G	2.431	G	9.60224	G	5.377	G	6.40163	G	7.543	G	17.2961	G	2.779	G	3.659	G	1.257	G	7.24446	G	1.39	G	11.2411	G
39.6857	N	17.981	N	17.6018	N	1.521	G	31.953	N	48.75	N	6.698	N	48.2172	N	77.858	N	23.9649	N	72.011	N	23.1225	N	68.4674	N	40.469	N	73.516	N	18.6971	N	13.047	N	10.3295	N
7.79986	G	8.597	G	8.74313	G	105.1	N	3.175	G	9.27	G	5.161	G	10.3907	G	3.31	G	1.985	G	4.764	G	32.3595	G	3.97	G	10.594	G	5.85	G	9.56413	G	3.72	G	10.3708	G
6.65491	N	6.817	N	6.71724	N	13.56	G	53.1	N	91.821	N	58.422	N	90.7546	N	29	N	26.2274	N	28.445	N	17.2524	N	23.3897	N	3.786	N	18.891	N	85.1787	N	3.323	N	42.1789	N
2.89016	G	2.712	G	3.176	G	17.14	N	3.243	G	10.645	G	2.331	G	11.6829	G	9.146	G	4.367	G	9.43669	G	9.56095	G	1.588	G	18.175	G	8.958	G	17.0984	G	7.996	G	19.5983	G
113.28	N	9.91	N	9.82138	N	7.542	G	2.281	N	20.03	N	10.615	N	18.1453	N	5.154	N	15.8999	N	3.98985	N	99.6657	N	15.1281	N	20.909	N	85	N	26.2087	N	2.133	N	51.5385	N
10.1803	G	2.666	G	17.5351	G	5.834	N	6.851	G	4.491	G	16.026	G	10.8361	G	4.786	G	31.8866	G	7.63629	G	27.5335	G	10.7484	G	1.339	G	5.562	G	2.382	G	3.77	G	58.5881	G
14.8224	N	4.139	N	58.5889	N	1.853	G	54.2	N	1.946	N	30.209	N	16.1214	N	14.919	N	22.6429	N	12.2665	N	55.5725	N	3.176	N	1.587	N	1.455	N	53.6657	N	12.103	N	16.834	N
4.79695	G	3.307	G	9.56095	G	15.6	N	1.439	G	2.79	G	11.915	G	23.8267	G	8.016	G	4.14468	G	9.65941	G	11.1442	G	19.5987	G	11.266	G	9.59	G	1.985	G	15.724	G	12.5289	G
19.8504	N	3.075	N	8.17264	N	2.326	G	3.77	N	16.149	N	12.758	N	4.764	N	6.306	N	80.269	N	4.52659	N	122.863	N	19.4216	N	3.09	N	26.921	N	66.8544	N	21.478	N	26.3941	N
2.382	G	3.807	G	9.131	G	7.614	N	2.728	G	23.674	G	3.082	G	25.9269	G	3.515	G	2.382	G	4.64689	G	2.779	G	82.8869	G	64.953	G	1.457	G	2.382	G	25.597	G	1.588	G
28.4629	N	60	N	10.0346	N	10.471	G	3.432	N	7.59	N	69.6	N	8.57004	N	8.008	N	34.1837	N	6.93321	N	6.46276	N	19.1592	N	9.039	N	54.062	N	40.6155	N	13.742	N	1.985	N
2.779	G	7.662	G	12.8029	G	34.5	N	2.333	G	22.486	G	8.878	G	3.97	G	18	G	3.573	G	18.4486	G	30.7627	G	8.57004	G	1.141	G	1.523	G	19.6765	G	2.53	G	7.543	G
23.7307	N	8.82	N	33.6394	N	6.49	G	49.7	N	9.467	N	5.359	N	2.779	N	24.883	N	12.704	N	24.5402	N	39.8143	N	28.3907	N	9.883	N	6.812	N	76.4201	N	2.53	N	19.4605	N
1.588	G	8.866	G	3.59483	G	7.036	N	7.792	G	3.12	G	6.947	G	29.3101	G	5.97	G	35.0436	G	6.07291	G	9.95676	G	3.98985	G	7.393	G	1.058	G	1.588	G	2.133	G	19.9159	G
104.319	N	10.352	N	14.7775	N	2.184	G	7.184	N	6.547	N	1.587	N	8.81499	N	13.529	N	92.2513	N	12.9255	N	5.61874	N	15.8204	N	28.564	N	14.132	N	13.1617	N	5.308	N	6.79545	N
5.78032	G	2.847	G	2.80719	G	1.787	N	4.118	G	25.161	G	1.455	G	8.02893	G	9.131	G	1.588	G	9.60224	G	1.588	G	8.09721	G	3.585	G	1.19	G	1.985	G	12.844	G	1.588	G
17.3414	N	2.514	N	34.4052	N	5.565	G	1.241	N	9.826	N	5.556	N	23.9101	N	21.241	N	43.8332	N	16.9737	N	5.57309	N	13.4805	N	16.482	N	45.173	N	51.7974	N	1.935	N	21.9255	N
12.7104	G	9.378	G	21.6258	G	17.803	N	1.689	G	7.055	G	8.003	G	14.3512	G	8.916	G	1.588	G	13.6433	G	6.07291	G	11.943	G	8.638	G	2.05	G	8.42156	G	3.323	G	24.7291	G
7.03484	N	31	N	6.749	N	1.323	G	21.276	N	27.347	N	16.016	N	13.7128	N	13.293	N	15.0983	N	12.5353	N	27.2751	N	10.7996	N	15.293	N	44.363	N	5.61437	N	10.129	N	14.0161	N
17.9579	G	2.856	G	36.5224	G	33.2	N	10.323	G	11	G	1.521	G	1.588	G	4.16	G	4.367	G	5.161	G	4.43846	G	5.57229	G	11.63	G	19.019	G	8.77013	G	3.77	G	7.79986	G
16.593	N	15.447	N	40.8362	N	9.789	G	4.101	N	14.407	N	1.587	N	32.604	N	8.124	N	51.6096	N	7.32028	N	37.3553	N	4.91049	N	11.32	N	11.168	N	12.4332	N	11.67	N	15.9245	N
3.573	G	2.513	G	2.41495	G	38.775	N	2.712	G	1.258	G	4.898	G	2.382	G	9.222	G	68.5921	G	9.65941	G	9.95676	G	4.52659	G	5.165	G	1.19	G	2.382	G	5.258	G	9.925	G
78.1487	N	34.938	N	28.8575	N	9.46	G	22.6	N	33.83	N	2.448	N	3.20061	N	2.827	N	8.734	N	47.3033	N	32.0589	N	6.93321	N	5.733	N	64.911	N	11.1235	N	2.877	N	28.289	N
3.91005	G	3.845	G	5.68425	G	18.783	N	1.455	G	1.489	G	12.635	G	14.215	G	1.142	G	23.4262	G	11.3772	G	2.779	G	7.32028	G	3.502	G	1.324	G	21.438	G	5.804	G	1.588	G
37.214	N	2.426	N	63.5303	N	4.563	G	3.175	N	4.282	N	2.116	N	4.04861	N	43.138	N	5.161	N	17.8515	N	94.3669	N	65.3732	N	7.109	N	13.38	N	7.146	N	9.994	N	17.1448	N
5.52942	G	14.768	G	10.8361	G	83.236	N	7.672	G	13.49	G	6.217	G	14.5715	G	1.479	G	26.2302	G	10.8361	G	2.382	G	17.364	G	6.704	G	1.72	G	5.558	G	9.474	G	2.382	G
106.668	N	7.275	N	21.2899	N	10.785	G	2.976	N	4.78	N	4.299	N	8.86699	N	1.192	N	46.0548	N	27.0953	N	3.59483	N	18.6888	N	20.396	N	52.198	N	5.57229	N	6.103	N	22.0843	N
6.16303	G	4.413	G	25.915	G	41.997	N	7.08	G	13.931	G	14.154	G	3.39197	G	7.831	G	14.689	G	4.52659	G	34.7014	G	19.9489	G	1.141	G	8.13	G	34.6279	G	3.076	G	3.83502	G
25.9876	N	2.455	N	11.7568	N	6.286	G	10.282	N	9.199	N	2.653	N	35.2989	N	18.636	N	19.4594	N	5.955	N	6.4048	N	6.07291	N	43.599	N	5.808	N	14.7104	N	4.117	N	23.9709	N
2.382	G	2.253	G	2.382	G	6.217	N	9.952	G	2.841	G	3.042	G	9.06152	G	10.377	G	20.7127	G	1.985	G	14.4294	G	12.4765	G	7.407	G	8.174	G	9.74834	G	17.212	G	1.985	G
21.8711	N	2.002	N	7.63629	N	3.373	G	12.971	N	39.107	N	3.772	N	5.34124	N	27.408	N	22.7334	N	4.8299	N	4.91049	N	32.0633	N	1.852	N	12.6	N	5.9681	N	7.593	N	25.4211	N
19.3351	G	24.792	G	3.76634	G	10.847	N	3.838	G	8.564	G	15.5	G	4.97441	G	4.023	G	6.87803	G	27.5113	G	2.382	G	24.0427	G	1.985	G	2.319	G	31.4186	G	51.591	G	3.97	G
10.4887	N	11.885	N	14.5377	N	23.216	G	3.374	N	6.19	N	3.307	N	7.4906	N	5.829	N	4.367	N	40.1387	N	5.57229	N	8.18654	N	1.587	N	10.251	N	7.94	N	7.143	N	24.0157	N
8.18455	G	1.132	G	2.89016	G	15.025	N	14.023	G	4.323	G	10.071	G	5.52942	G	1.461	G	1.588	G	17.9198	G	7.32028	G	2.779	G	3.502	G	4.299	G	6.749	G	5.11	G	17.4501	G
5.29677	N	27.844	N	38.1831	N	5.456	G	12.831	N	8.165	N	5.438	N	14.9232	N	4.923	N	2.382	N	16.9991	N	38.8135	N	26.894	N	20.404	N	2.778	N	4.367	N	6.746	N	4.91049	N
3.176	G	2.382	G	4.8299	G	33.2	N	9.458	G	4.664	G	55.53	G	17.8428	G	27.662	G	1.985	G	21.7457	G	2.382	G	32.3047	G	19.67	G	14.684	G	16.3409	G	13.939	G	26.3572	G
19.4693	N	28.622	N	24.8288	N	3.175	G	16.1	N	16.107	N	14.502	N	12.9803	N	41.633	N	9.26797	N	31.1323	N	2.66308	N	21.8969	N	6.567	N	6.945	N	5.161	N	1.935	N	13.9006	N
24.5604	G	5.426	G	6.86651	G	12.372	N	24.416	G	16.948	G	14.246	G	3.27366	G	10.909	G	5.161	G	13.7862	G	2.779	G	4.764	G	11.721	G	5.556	G	27.0075	G	3.176	G	43.6319	G
16.961	N	65.548	N	18.732	N	8.995	G	1.852	N	13.782	N	2.183	N	14.9181	N	2.479	N	11.5404	N	3.97	N	44.4187	N	10.7583	N	32.867	N	5.496	N	17.0758	N	1.587	N	4.8299	N
14.3909	G	10.645	G	2.382	G	11.244	N	3.638	G	3.096	G	18	G	16.8669	G	3.498	G	13.9855	G	17.5291	G	2.779	G	2.382	G	23.618	G	25.494	G	13.895	G	1.637	G	1.985	G
3.176	N	21.98	N	17.6427	N	10.189	G	24.885	N	15.196	N	2.514	N	7.03484	N	18.027	N	23.109	N	9.95954	N	45.233	N	6.749	N	7.957	N	1.587	N	8.337	N	16.618	N	9.20961	N
4.52659	G	10.437	G	10.848	G	33.497	N	17.079	G	16.459	G	2.116	G	5.161	G	20.443	G	15.1467	G	8.87732	G	35.5204	G	13.9006	G	2.935	G	7.503	G	42.0895	G	24.158	G	5.161	G
11.0592	N	1.853	N	8.34653	N	1.852	G	13.492	N	7.541	N	8.999	N	16.2147	N	34.057	N	46.927	N	4.64689	N	68.5012	N	7.146	N	28.127	N	15.368	N	25.6923	N	4.266	N	15.5287	N
13.9208	G	13.347	G	4.91049	G	8.267	N	5.028	G	4.606	G	9.992	G	2.382	G	1.985	G	1.985	G	2.779	G	6.3651	G	13.9006	G	32	G	8.598	G	19.4693	G	20.069	G	15.9296	G
6.08085	N	11.624	N	7.15712	N	13.304	G	28.046	N	17.711	N	2.712	N	31.9565	N	2.133	N	17.2369	N	1.985	N	83.8889	N	14.5826	N	23.664	N	7.877	N	33.2182	N	2.53	N	28.4335	N
5.68425	G	1.994	G	3.176	G	2.469	N	5.49	G	1.793	G	3.108	G	12.7596	G	6.085	G	2.382	G	14.8911	G	46.0508	G	35.3489	G	2.331	G	30.114	G	5.02165	G	2.827	G	54.5756	G
18.0798	N	7.548	N	3.66034	N	10.454	G	3.903	N	33.513	N	10.056	N	17.7078	N	5.556	N	16.3207	N	2.382	N	12.417	N	5.9681	N	12.798	N	8.069	N	3.02355	N	1.438	N	11.9267	N
2.382	G	3.405	G	5.68425	G	24	N	4.895	G	12.563	G	8.929	G	4.764	G	4.034	G	10.7567	G	69.0069	G	7.146	G	13.101	G	1.389	G	6.614	G	28.2974	G	4.911	G	36.7328	G
24.1106	N	14.572	N	29.2037	N	13	G	6.151	N	18	N	3.442	N	7.71252	N	2.051	N	25.0245	N	6.04234	N	6.36431	N	11.91	N	7.49	N	4.696	N	14.7319	N	6.845	N	12.3646	N
6.46276	G	2.504	G	4.27569	G	11.8	N	12.785	G	4.317	G	21.245	G			9.276	G	6.749	G	14.8224	G	2.382	G	10.322	G	13.641	G	16.082	G	7.38499	G	8.631	G	30.6365	G
19.8532	N	38.21	N	101.443	N	7.9	G	49.717	N	8.422	N	4.299	N			11.045	N	57.1819	N	18.4117	N	16.1234	N	5.955	N	1.587	N	5.427	N	39.9974	N	2.48	N	11.2287	N
5.02165	G	1.853	G	8.42831	G	56	N	12.435	G			3.373	G			1.124	G	9.925	G	20.8302	G	14.0359	G	6.352	G	2.48	G	26.524	G	232.393	G	19.607	G	2.779	G
13.1729	N	2.077	N	12.307	N	3.841	G	22.912	N			1.918	N			2.984	N	21.4563	N	3.97	N	7.146	N	8.734	N	3.869	N	17.136	N	1.985	N	1.587	N	24.4576	N
6.21384	G	1.323	G	7.26351	G	15.355	N	5.811	G			9.789	G			2.088	G	13.9006	G	18.5359	G	4.367	G	20.2637	G	13.393	G	14.154	G	3.573	G	15.825	G	11.5694	G
7.03484	N	24.881	N	9.925	N	3.241	G	6.553	N			12.639	N			7.497	N	4.367	N	6.54732	N	17.1861	N	19.2847	N	19.742	N	8.271	N	3.20061	N	1.587	N	11.245	N
2.779	G	6.514	G	2.89016	G	4.251	N	15.875	G			4.564	G			1.192	G	16.2921	G	56.7639	G	7.95032	G	3.66034	G	30.655	G	22.421	G	34.6351	G	3.075	G	15.6196	G
2.382	N	18.669	N	7.543	N	4.043	G	10.846	N			2.117	N			2.719	N	19.1568	N	9.91468	N	4.38486	N	35.8824	N	6.057	N	1.192	N	4.04861	N	1.935	N	17.121	N
7.71768	G	2.262	G	3.573	G	82.336	N					14.356	G			4.948	G	7.55967	G	3.176	G	50.4373	G	25.8983	G	12.702	G	14.301	G	79.4663	G	1.687	G	19.9485	G
9.41168	N	17.498	N	27.9956	N	4.432	G					2.249	N			4.839	N	14.3579	N	2.382	N	10.3907	N	58.3538	N	12.85	N	2.315	N	4.38486	N	4.613	N	5.61437	N
5.955	G	10.379	G			53.638	N					5.754	G			4.333	G	3.176	G	4.367	G	32.0589	G	4.367	G	9.03	G	1.587	G	27.4649	G	29.861	G	6.0078	G
4.43846	N	8.68	N			11.773	G					3.706	N			4.209	N	5.558	N	4.91049	N	7.9797	N			7.392	N	26	N	11.6782	N	4.315	N	8.77013	N
13.6834	G	4.058	G			12.103	N					10.385	G			6.128	G	38.1315	G	22.7469	G	2.41495	G			4.911	G	19.54	G	29.8786	G	11.012	G	5.61437	G
		7.548	N			19.444	G					24.8	N			5.21	N	3.97	N	7.32028	N	38.7905	N			9.821	N	32.898	N	8.74313	N	2.877	N	10.322	N
		2.719	G			50.74	N					7.344	G			2.077	G	23.4262	G	17.0595	G	2.382	G			20.387	G	3.829	G	48.6857	G	13.997	G	14.8375	G
		3.47	N			2.977	G					2.779	N			2.97	N	10.719	N	18.6939	N	10.7484	N			14.385	N	3.55	N	10.0985	N	24.314	N	4.78067	N
		5.341	G			12.369	N					17.134	G			51	G	61.1769	G	28.2509	G	36.2159	G			1.339	G	8.047	G	91.177	G	27.952	G	33.3754	G
		35.41	N			12.368	G					21.248	N			6.286	N	5.558	N	23.5195	N	4.52659	N			3.86	N	2.716	N	6.36431	N	10.565	N	2.779	N
		5.904	G			34.261	N					7.082	G			13.57	G	35.3417	G	3.176	G	10.7849	G			2.744	G	17.268	G	33.7545	G	3.225	G	8.02734	G
		21.639	N			9.26	G					2.514	N			20.853	N	10.719	N	5.57229	N	25.9154	N			16.521	N	15.244	N	11.91	N	33.978	N	5.558	N
		1.323	G			8.201	N					1.989	G			1.587	G	23.4575	G	11.7401	G	73.3569	G			1.24	G	6.269	G	7.146	G	8.532	G	9.26797	G
		3.241	N			20.173	G					2.911	N			1.457	N			38.4626	N	4.764	N			17.46	N	39.962	N	19.1024	N	13.74	N	14.342	N
		1.264	G			3.704	N					1.72	G			7.151	G			11.2986	G	12.0152	G					233	G	100.498	G	1.984	G	6.79545	G
		20	N			3.508	G					7.341	N			0.992	N			59.8069	N	3.98985	N					2.646	N	11.91	N	2.629	N	5.57229	N
		1.455	G			65.159	N					2.116	G			7.294	G			3.176	G	31.5679	G					3.308	G	1.588	G	20.064	G	12.7596	G
		9.458	N			2.05	G					19.863	N			4.898	N			80.6764	N	8.77013	N					4.444	N	26.6447	N	16.977	N	22.7159	N
		6.071	G			22.225	N					9.001	G			6.94	G			18.2398	G	3.176	G					33.612	G	1.588	G	4.267	G	6.07291	G
		17.531	N			5.225	G					1.257	N			1.207	N					4.367	N					4.637	N	59.6064	N	10.17	N	19.4895	N
		4.594	G			1.918	N					2.649	G			7.623	G					11.3629	G					6.82	G	15.086	G	19.951	G	44.14	G
		9.392	N			1.264	G					25.353	N			8.548	N					28.8619	N					3.574	N	54.8495	N	12.55	N	3.97	N
		3.574	G			6.02	N					14.32	G			3.339	G					30.7076	G					68.179	G	14.292	G	26.6	G	46.5713	G
		7.408	N			13.691	G					29.032	N			2.448	N					6.86651	N					4.114	N	4.38486	N	13.344	N	11.513	N
		3.838	G			15.675	N					16.812	G			1.966	G					32.2229	G					27.118	G	6.36431	G	5.01	G	12.8029	G
		27.977	N			12.839	G					2.851	N			2.192	N					25.2234	N					12.94	N	23.5592	N	19.009	N	3.97	N
						1.653	N					9.947	G			7.688	G					72.857	G					10.306	G	5.68425	G	6.287	G	3.573	G
						1.124	G					1.852	N			5.179	N					16.0769	N					5.509	N	5.22174	N	25.497	N	4.43846	N
						13.163	N					12.782	G			10.707	G					14.7771	G					1.852	G	10.322	G	2.978	G	4.764	G
						4.634	G					24.729	N			3.728	N					22.3622	N					1.918	N	12.7155	N	2.579	N	4.764	N
						5.227	N					8.289	G			18.999	G					21.5055	G					8.958	G	11.9366	G	9.009	G	3.98985	G
						1.39	G					5.89	N			12.442	N					26.3806	N					9.4	N	3.97	N	13.642	N	13.0724	N
						8.069	N					5.427	G			1.994	G					29.4951	G					4.509	G	1.985	G	20.042	G	1.985	G
						4.235	G					10.127	N			3.495	N					15.8038	N					1.836	N	20.6591	N	2.282	N	5.3996	N
						7.941	N					4.696	G			3.843	G					8.77013	G					8.902	G	10.719	G	2.48	G	1.588	G
						1.786	G					36.6	N			6.004	N					13.9855	N					2.331	N	29.0052	N	1.339	N	20.667	N
						5.43	N					2.187	G			7.205	G					52.5036	G					29	G	10.719	G	6.895	G	13.5504	G
						2.521	G					11.046	N			5.257	N					25.5815	N					12	N	7.543	N	25.598	N
						18.528	N					11.772	G			8.834	G					39.6051	G					44.307	G	3.176	G	11.659	G
						5.768	G					4.432	N			7.839	N					10.511	N					1.985	N	36.5335	N	22.423	N
						1.587	N					6.945	G			1.124	G					2.779	G					34.333	G	6.352	G	6.25	G
						1.457	G					7.873	N			1.7	N					16.5061	N					1.835	N	40.5484	N	1.637	N
						14.881	N					4.895	G			6.321	G					31.4075	G					8.395	G	2.779	G	3.075	G
						11.116	G					12.967	N			1.077	N					14.5596	N					12.512	N	8.81499	N	15.628	N
						32.143	N					2.05	G			1.853	G					26.8813	G					28.04	G	1.588	G	5.457	G
						2.649	G					49.008	N			2.071	N					8.42156	N					12.996	N	62.6252	N	23.626	N
						20.968	N					4.169	G			1.272	G					1.985	G					6.152	G	15.9991	G	8.384	G
						4.961	G					55.084	N			21.622	N					12.409	N					7.751	N	19.0802	N	31	N
						2.183	N					2.587	G			11.058	G					15.4544	G					1.241	G	12.3134	G	11.955	G
						9.325	G					19.191	N			1.805	N					20.4455	N					10.419	N	4.764	N	40.98	N
						5.298	N					2.845	G			2.517	G					32.7283	G					52	G	3.97	G	1.737	G
						9.59	G					39.029	N			2.778	N					55.8333	N					1.786	N	2.382	N	4.812	N
						26.026	N					1.324	G			8.334	G					18.7642	G					43.564	G	11.116	G	29.663	G
						2.977	G					46.244	N			23.777	N					18.5375	N					14.832	N	24.2698	N	23.498	N
						12.376	N					11.791	G			2.25	G					1.985	G					1.687	G	1.985	G	15.568	G
						3.704	G					64.9	N			6.886	N					80.0126	N					26.637	N	30.6111	N	2.034	N
						8.223	N					8.135	G			10.264	G											1.438	G	55.2116	G	2.78	G
						11.523	G					8.012	N			40.006	N											59.378	N	7.21746	N	17.569	N
						27.971	N					8.602	G			11.198	G											6.102	G			5.385	G
						1.323	G					16.339	N			53	N											3.472	N			5.637	N
						3.704	N					1.589	G															5.556	G			10.827	G
						7.475	G					47.092	N															55.251	N			22.671	N
						12.17	N					31.284	G															14.138	G			5.506	G
						4.63	G					8.082	N															4.117	N			31.092	N
						2.05	N					1.257	G															6.153	G			2.133	G
						4.762	G					30.688	N															23.812	N			2.232	N
						20.295	N					12.511	G															1.489	G			1.339	G
						16.223	G					3.373	N															9.725	N			3.874	N
						2.712	N					11.114	G															10.071	G			7.692	G
						2.117	G					42	N															13.747	N			7.151	N
						28.723	N					7.144	G															10.932	G			4.464	G
						2.649	G					15.877	N															4.273	N			2.53	N
						6.96	N					4.861	G															1.59	G			17.173	G
						3.186	G					28.6	N															21.242	N			9.549	N
						3.506	N					1.438	G															9.921	G			11.13	G
						1.721	G					16.816	N															29.775	N			9.823	N
						4.432	N					9.673	G															1.438	G			11.17	G
						5.622	G					61.905	N															2.183	N			13.8	N
						5.424	N					3.72	G															7.044	G			1.389	G
						2.778	G					15.824	N															7.341	N			1.94	N
						12.587	N					5.953	G															3.226	G			8.849	G
						3.505	G					21.283	N															7.938	N			15.304	N
						8.538	N					18.502	G															1.339	G			7.342	G
						9.865	G					17.808	N															23.959	N			24.515	N
						3.439	N					4.961	G															1.192	G			1.092	G
						3.44	G					63.6	N															2.976	N			14.236	N
						3.505	N					9.525	G															5.854	G			18.092	G
						5.49	G					5.01	N															42.989	N			6.349	N
						4.63	N					10.367	G															1.19	G			2.828	G
						2.845	G					8.834	N															8.552	N			1.587	N
						1.786	N					9.183	G															1.291	G			1.241	G
						7.475	G					1.886	N															62	N			3.622	N
						15.042	N					7.048	G															16.158	G			4.078	G
						10.569	G					13.46	N															19.11	N			13.706	N
						8.497	N					3.919	G															12.153	G			15.036	G
						1.655	G					36.311	N															4.464	N			2.579	N
						13.115	N					6.599	G															3.869	G			2.629	G
						1.389	G					10.224	N															2.976	N			2.333	N
						13.248	N					4.963	G															4.565	G			13.545	G
						3.505	G					12.802	N															1.438	N			16.881	N
						21.069	N					4.415	G															5.109	G			4.635	G
						15.295	G					23.861	N															24.654	N			4.861	N
						3.108	N					17.623	G															1.339	G			5.011	G
						1.721	G					52.8	N															31.119	N			4.712	N
						25.755	N					1.857	G															10.984	G			24.021	G
						4.235	G					26.852	N															3.474	N			20	N
						17.555	N					13.246	G															18.264	G			16.072	G
						1.521	G					12.211	N															1.538	N			2.034	N
						6.883	N					1.687	G															20.139	G			13.149	G
						8.142	G					6.548	N															8.523	N			39.403	N
						2.844	N					8.484	G																			14.744	G
						2.381	G					5.853	N																			5.209	N
						11.253	N					13.146	G																			18.057	G
						1.655	G					8.387	N																			68.402	N
						1.787	N					3.373	G																			11.923	G
						1.985	G					19.7	N																			16.375	N
						21.035	N					16.634	G																			33.6	G
						1.257	G					10.571	N																			11.179	N
						5.372	N					10.667	G																			12.798	G
						21.118	G					15.19	N																			10.764	N
												2.629	G																			9.673	G
												5.619	N																			8.645	N
												18.706	G																			2.629	G
												23.171	N																			9.077	N
												10.02	G																			16.347	G
												14.264	N																			19.213	N
												15.808	G																			6.647	G
												23.481	N																			19.753	N
												13.362	G																			2.183	G
												63.305	N																			26.294	N
												6.68	G																			7.893	G
												6.817	N																			2.547	N
												5.89	G																			3.323	G
												3.903	N																			20.072	N
												1.521	G																			4.464	G
												3.709	N																			4.626	N
												5.888	G																			2.877	G
												20.833	N																			1.687	N
																																3.095	G
																																14.113	N
																																14.583	G
																																14.161	N
																																8.088	G
																																8.612	N
																																5.853	G
																																2.629	N
																																1.687	G
																																3.869	N
																																14.887	G
																																8.233	N
																																45.501	G
																																14.902	N
																																4.28	G
																																6.715	N
																																9.136	G
																																32.038	N
																																11.263	G
																																1.587	N
																																22.827	G
																																2.29	N
																																19.457	G
																																5.407	N
																																12.351	G
																																15.982	N
																																6.697	G
																																4.762	N
																																6.597	G
																																8.978	N
																																8.392	G
																																29.523	N
																																7.639	G
																																18.353	N
																																42.361	G
																																23.365	N
																																12.556	G
																																2.827	N
																																17.76	G
